1 Time-course of host cell transcription during the HTLV-1  
2 transcriptional burst

3 Short title: Host cell transcription during the HTLV-1 plus-strand burst

4  
5 Helen Kiiik<sup>1¶</sup>, Saumya Ramanayake<sup>1¶</sup>, Michi Miura<sup>1,#a</sup>, Yuetsu Tanaka<sup>2</sup>, Anat Melamed<sup>1</sup>,  
6 Charles R.M. Bangham<sup>1\*</sup>

7

8 <sup>1</sup> Department of Infectious Diseases, Faculty of Medicine, Imperial College London, London,  
9 United Kingdom

10 <sup>2</sup> Department of Infectious Disease and Immunology, Okinawa-Asia Research Center of  
11 Medical Science, Faculty of Medicine, University of the Ryukyus, Nishihara, Okinawa, Japan

12 <sup>#a</sup> Current Address: Department of Microbiology, Kawasaki Medical School, Kurashiki,  
13 Okayama, Japan

14 \* Corresponding author

15 E-mail: [c.bangham@imperial.ac.uk](mailto:c.bangham@imperial.ac.uk)

16 ¶ These authors contributed equally to this work.

17

## 18 **Abstract**

19 The human T-cell leukemia virus type 1 (HTLV-1) transactivator protein Tax has pleiotropic  
20 functions in the host cell affecting cell-cycle regulation, DNA damage response pathways and  
21 apoptosis. These actions of Tax have been implicated in the persistence and pathogenesis of  
22 HTLV-1-infected cells. It is now known that *tax* expression occurs in transcriptional bursts of  
23 the proviral plus-strand, but the effects of the burst on host transcription are not fully  
24 understood. We carried out RNA sequencing of two naturally-infected T-cell clones transduced  
25 with a Tax-responsive Timer protein, which undergoes a time-dependent shift in fluorescence  
26 emission, to study transcriptional changes during successive phases of the HTLV-1 plus-  
27 strand burst. We found that the transcriptional regulation of genes involved in the NF- $\kappa$ B  
28 pathway, cell-cycle regulation, DNA damage response and apoptosis inhibition were  
29 immediate effects accompanying the plus-strand burst, and are limited to the duration of the  
30 burst. The results distinguish between the immediate and delayed effects of HTLV-1  
31 reactivation on host transcription, and between clone-specific effects and those observed in  
32 both clones. The major transcriptional changes in the infected host T-cells observed here,  
33 including NF- $\kappa$ B, are transient, suggesting that these pathways are not persistently activated  
34 at high levels in HTLV-1-infected cells. The two clones diverged strongly in their expression of  
35 genes regulating the cell cycle. Up-regulation of senescence markers was a delayed effect of  
36 the proviral plus-strand burst and the up-regulation of some pro-apoptotic genes outlasted the  
37 burst. We found that activation of the arylhydrocarbon receptor (AhR) pathway enhanced and  
38 prolonged the proviral burst, but did not increase the rate of reactivation. Our results also  
39 suggest that sustained plus-strand expression is detrimental to the survival of infected cells.

40

## 41 **Author Summary**

42

43 Human T-cell leukemia virus type 1 (HTLV-1) causes a lifelong infection that results in disease  
44 in ~10% of cases. The HTLV-1 transactivator protein Tax is involved in both the persistence  
45 of infected host cells, and the pathogenesis of HTLV-1 infection. *tax* is transcribed from the  
46 plus-strand of the provirus, and *tax* expression is not constitutive, but limited to transcriptional  
47 bursts. How these bursts affect host cell transcription is not completely understood. Here, we  
48 studied the temporal changes in host transcription during successive phases of the plus-strand  
49 burst in two naturally-infected T-cell clones. We found that the deregulation of genes involved  
50 in Tax-associated processes, including NF- $\kappa$ B activation, cell-cycle regulation, DNA damage  
51 response and suppression of apoptosis, coincided with the early phase of the plus-strand  
52 burst: these transcriptional effects appear to be limited to the duration of the proviral plus-  
53 strand expression. Regulation of cell-cycle genes diverged between the clones, demonstrating  
54 the heterogeneity of naturally-infected cells. We observed a pro-apoptotic response, which  
55 outlasted the burst and may indicate increased risk of apoptosis following the burst. Finally,  
56 we observed that AhR activity regulated the intensity and duration of the burst, but not the  
57 dynamics of reactivation.

58

## 59 Introduction

60 Human T-cell leukaemia virus type I (HTLV-1) is a pathogenic retrovirus that mainly infects  
61 CD4<sup>+</sup> T-cells, causing a lifelong infection in the host. An estimated 10 million people in the  
62 world are living with the virus; between 5% and 10% of infected hosts develop one of the  
63 associated diseases Adult T-cell leukaemia (ATL) or HTLV-1-associated myelopathy/tropical  
64 spastic paraparesis (HAM/TSP) [1,2].

65 The sense and antisense strands of the provirus encode the viral transactivator Tax protein  
66 and HBZ (HTLV-1 bZIP protein), respectively: these two proteins promote the proliferation and  
67 survival of HTLV-1-infected cells, and both have been implicated in the development of ATL  
68 [3,4].

69 Tax potently modulates proviral and cellular transcription, which has contrasting  
70 consequences in stimulating cell cycle progression and proliferation [5–10], or causing  
71 temporary cell cycle arrest and senescence [11–14]. HTLV-1-infected or Tax-transduced cells  
72 are also protected from apoptosis [15,16]. Transcriptional down-regulation of pro-apoptotic  
73 factors [17,18], and up-regulation of anti-apoptotic factors [19–22] are likely to contribute to  
74 the protective activity of Tax. By contrast, there is evidence that Tax promotes apoptosis [23–  
75 25], and Tax-expressing cells are more susceptible to cell death following exogenous DNA  
76 damage [26,27]. Tax expression impairs the functions of p53 [28], causes genome instability,  
77 induces double-strand DNA breaks, and inhibits DNA damage-response pathways [5,29–32].  
78 HBZ opposes many functions of Tax including proviral transcription, likely mediated by its  
79 interactions with the transcription factors CREB, c-JUN and CBP/p300, and by suppression of  
80 NF- $\kappa$ B [33–37].

81 The mechanisms of the pleiotropic effects of HTLV-1 proviral expression remain unclear, and  
82 while many important findings have been made with *tax*-transfected cell lines or long-term in  
83 vitro transformed cell lines, it is a long-standing question how these observations apply to  
84 untransformed, naturally-infected T-cells. It is now clear that the *tax* and *HBZ* genes are not  
85 constitutively transcribed at the single-cell level in naturally-infected cells *in vivo*, but rather in

86 intermittent bursts [20,38,39], and it is not understood how the diverse observations on cell  
87 proliferation and apoptosis are related to these bursts. We studied two naturally-infected CD4+  
88 T-cell clones competent in Tax expression (3.60 and TBX4B), isolated by limiting dilution from  
89 peripheral blood mononuclear cells (PBMCs) of HTLV-1-infected subjects [40], to quantify host  
90 and viral transcription during proviral reactivation. Each clone was stably transduced with a  
91 reporter construct, under the control of a Tax-responsive promoter, that expresses a  
92 fluorescent protein – the Timer Protein – which undergoes a time-dependent change in  
93 emission frequency. This approach made it possible to separate the plus-strand transcriptional  
94 burst into successive phases. Here we report the changes in transcription in the host CD4<sup>+</sup> T  
95 cell accompanying the onset and the progression through the HTLV-1 plus-strand burst.

96

## 97 Results

### 98 I. The Tax-responsive Timer separates temporal phases of 99 spontaneous HTLV-1 proviral reactivation

100 The Fluorescent Timer protein [41], which changes its emission of blue fluorescence to red  
101 fluorescence during chromophore maturation, allows temporal analysis of cellular processes.  
102 It has been applied to study the *in vivo* dynamics of both regulatory T-cell differentiation in  
103 mice [42], and *Foxp3* expression in inflammation [43].

104 Two naturally HTLV-1-infected T-cell clones designated TBX4B and 3.60 were stably  
105 transduced with a Tax reporter system containing 5 tandem repeats of the Tax-responsive  
106 element (TRE) type 2 linked to a truncated HTLV-1 5'LTR (long terminal repeat) and the Timer  
107 Protein gene (Fig 1A) [41]. The purified Timer protein initially fluoresces blue, reaching  
108 maximum intensity in 0.25 h, and then matures to the red-emitting form with a half-time of 7.1  
109 h, reaching a plateau between 20-25 h (Fig 1B) [41]. The half-life of the blue fluorescence in  
110 mouse lymphocytes is ~4 h [42,43].

111

112 **Fig 1. The principle behind Tax-induced Timer protein expression.** (A) Tax-responsive reporter  
113 construct containing the Timer protein gene *Fast-FT*. (B) Schematic of Timer protein expression during progression  
114 of the HTLV-1 plus-strand burst. (C) Representative gating strategy used to flow-sort four cell populations for RNA-  
115 seq analysis. (D) Tax expression in each respective Timer population, quantified by intracellular staining.

116

117 The HTLV-1 plus-strand burst begins with transcription of *tax*, resulting in a positive-feedback  
118 loop of potent activation of plus-strand transcription by Tax protein [44]. Expression of Tax  
119 protein is a surrogate for the proviral plus-strand transcriptional burst, and in this study the  
120 subsequent induction of the Timer protein by Tax was used to distinguish successive phases  
121 of the plus-strand burst. The clones were flow sorted into four populations based on the  
122 fluorescence of the Timer protein during spontaneous proviral expression, representing

123 respectively silent proviruses and the early phase (blue), mid-phase (blue-red) and late phase  
124 (red) of the plus-strand burst (Fig 1). Following termination of the burst and decay of remaining  
125 red fluorescence of the Timer protein, the cells re-enter the silent (non-fluorescent) double-  
126 negative (DN) state.

127 PolyA-selected RNA samples from each clone were sequenced. Clone 3.60 has a 202 bp  
128 deletion that lies in the coding region of *env* on the plus-strand and the 3'UTR of *hbx* on the  
129 minus-strand (S1 Fig). The deletion did not impair the expression of Tax protein, as shown by  
130 the expression of the Timer protein, the up-regulation of both the *Timer* and the plus-strand  
131 transcripts of the provirus in the RNA-seq data (Fig 2A). The expression trajectories of both  
132 the HTLV-1 plus-strand and the Tax-responsive *Timer* transcripts were closely similar in both  
133 clones (Fig 2A).

134

135 **Fig 2. RNA-seq validates the experimental setup.** (A) Expression of HTLV-1 plus- and minus-strands  
136 quantified by RNA-seq in each Timer population. Statistical significance was determined by the likelihood-ratio test  
137 (LRT). FDR-corrected p-value < 0.01; ns - not significant. (B) Principal component analysis (PCA) bi-plot of the  
138 RNA-seq data in each clone.

139

140 Principal component analysis of the respective Timer phases (Fig 2B) indicated distinct  
141 profiles of gene expression during the successive phases of proviral reactivation. Time-series  
142 differential expression analysis of the phases of proviral expression identified 10048  
143 significantly differentially expressed (DE) genes in clone 3.60, and 4798 DE genes in clone  
144 TBX4B, respectively representing 57% and 29% of expressed host genes (Likelihood-ratio  
145 test (LRT); FDR adjusted p-value < 0.01) (S1-S2 Data). *HTLV-1 plus-strand* and the Tax-  
146 responsive *Timer* were among the top most significantly DE genes in each clone (S1-S2 Data)  
147 and *HTLV-1 plus-strand* was the most significantly up-regulated gene in the early burst (Blue)  
148 population in each clone, with a log<sub>2</sub> fold change (LFC) of 9.60 in clone 3.60 and a LFC of  
149 9.13 in clone TBX4B (Wald test; FDR adjusted p-value < 0.01) (S1-S2 Data). The *Timer* had  
150 a LFC of 6.34 and 5.72 in clones 3.60 and TBX4B, respectively. The second most significantly

151 up-regulated gene during onset of proviral expression in TBX4B was *PNPLA3* (Figs S2-S3);  
152 the integration site of HTLV-1 in TBX4B lies between exons 2 and 3 of *PNPLA3*.

153 The trajectory of proviral minus-strand expression had no consistent relationship with plus-  
154 strand expression and differed between the two clones (Fig 2A). However, the expression of  
155 minus-strand expression in each clone closely resembled that of SP1, a known regulator of its  
156 transcription [45] (S3 Fig).

157 Further validating the Timer Protein reporter system used, NF- $\kappa$ B transcription factor genes  
158 *REL*, *RELB*, *NFKB1*, *NFKB2* were up-regulated in both clones (Fig 2A). The up-regulation of  
159 genes known to be expressed in response to Tax including *IL2RA*, *IL13* and *JUND* [46–49]  
160 was confirmed in both clones, and the Tax-repressed target *LCK* [50] was down-regulated  
161 (Fig 2A). The expression of *KAT2B* (*P/CAF*), which interacts with Tax to increase expression  
162 from the viral LTR [51], was unexpectedly down-regulated in both clones (S3 Fig).

163 To examine in detail the transcriptional effects shared by the two clones, the overlap of 3851  
164 genes differentially expressed in both clones was analyzed through K-means clustering. Using  
165  $k=5$  produced five clusters depicting respectively genes up-regulated during the early burst in  
166 each clone, genes up-regulated with a delayed peak (in mid-burst) in each clone, genes down-  
167 regulated in each clone, and two clusters showing genes with opposite trajectories (Fig 3A).

168

169 **Fig 3. Genes deregulated in both clones separate into clone-independent and clone-**  
170 **specific clusters.** (A) K-means clustering of 3851 shared significantly DE genes. Statistical significance was  
171 determined by LRT. FDR-corrected  $p$ -value  $< 0.01$ . The top 10 genes in each cluster, based on mean rank of sorted  
172  $p$ -values, are listed on the right of the panel. The mean expression trajectory is coloured as a yellow or blue line  
173 representing upregulation and downregulation, respectively. (B) ORA of K-means clusters with the Hallmarks gene  
174 set from The Molecular Signatures Database (MSigDB). Statistical significance was determined by Fisher's exact  
175 test in g:Profiler. FDR-corrected  $p$ -value  $< 0.05$ .

176

177 To infer functional characteristics of these clusters, an over-representation analysis (ORA) of  
178 the MSigDB Hallmark gene set [52] was performed. This analysis identified “TNF $\alpha$  signalling  
179 via NF- $\kappa$ B” as the most significant term in two clusters: immediately up-regulated genes during



180 plus-strand expression (Fig 3 cluster 1) and genes with a delayed peak of expression during  
181 mid-burst (Fig 3 cluster 2). *TNF* itself was downregulated (S3 Fig). “Hypoxia” was similarly an  
182 enriched term in the up-regulated cluster 1; *HIF1A* itself was upregulated (S3 Fig). Other  
183 enriched terms in cluster 1 were “IL2-STAT5 signaling” and “Inflammatory response”, the latter  
184 was enriched in cluster 2 as well. “TNF $\alpha$  signalling via NF- $\kappa$ B” and “Hypoxia” were also  
185 enriched when all differentially expressed genes in each clone were clustered and analyzed  
186 separately (S4B Fig cluster 1 and S4D Fig cluster 1).

187 Cluster 3 consisted of genes down-regulated in both clones and was enriched for “Allograft  
188 rejection”, “IL6/JAK/STAT3 signaling” and “Interferon gamma signaling” (Fig 3). “Interferon- $\gamma$   
189 response” was significant in both the delayed up-regulated gene cluster 2 and the down-  
190 regulated gene cluster 3 (Fig 3).

191 The fourth cluster contained genes that were differentially expressed in both clones, but these  
192 genes were down-regulated in clone 3.60 and up-regulated in TBX4B. This cluster included  
193 cell-cycle-related genes with Hallmark terms “G2M checkpoint, E2F targets”, “Mitotic spindle”.  
194 Cell-cycle-related genes are analysed in more detail below.

195 Cluster 5, which represented genes up-regulated in clone 3.60 and down-regulated in clone  
196 TBX4B, did not result in any significantly enriched Hallmark terms (Fig 3).

## 197 II. Clone-specific association between proviral expression and 198 cell cycle genes.

199 We investigated how the contrasting observations of Tax induced cell proliferation or cell cycle  
200 arrest and senescence relate to the transcriptional control of host genes in naturally infected  
201 T-cells during successive phases of proviral reactivation.

202 For a systematic analysis of genes associated with different cell cycle stages, cyclically  
203 expressed genes were obtained from the online database Cyclebase 3.0  
204 (<https://cyclebase.org/CyclebaseSearch>). All differentially expressed genes from each clone  
205 were separated into distinct groups of genes, based on the Cyclebase classification, each

206 group with peak expression in different cell cycle phases (G1, G1/S, G2, G2/M, M). The results  
207 (Fig 4A) show that genes associated with peak expression during different phases of cell-cycle  
208 progression were down-regulated in clone 3.60 during plus-strand expression, but were up-  
209 regulated in TBX4B. These groups contained genes with established roles in DNA replication  
210 including *GINS2*, *CHAF1B*, as well as phosphatases *CDC25A*, *CDC25C*, kinases *PLK1*,  
211 *AURKB*, *NEK2*, mitotic-spindle-related genes *PRC1*, *BIRC5*, *CDCA8*, and the known marker  
212 of cell proliferation *MKI67*. In clone TBX4B, expression of G1-S phase-related genes peaked  
213 during the early burst and G2-M phase genes peaked during the mid-burst (Fig 4A).

214

215 **Fig 4. Divergent association between proviral plus-strand expression and genes related**  
216 **to the cell cycle.** (A) Trajectories in each infected clone of differentially expressed Cyclebase 3.0 genes  
217 associated with G1, G1/S, S, G2, G2/M and M phases of the cell cycle. (B) Trajectories of cyclins, CDKs and  
218 transcription factors. Y-axis: normalized counts on log<sub>10</sub>-scale. Statistical significance was determined by LRT.  
219 FDR-corrected p-value < 0.01; ns - non-significant.

220

221 The trajectories of G1 phase cyclin-dependent kinase *CDK6* and cyclins *CCND1*, *CCND2*,  
222 *CCND3*, which mediate entry into the cell cycle, were similar in the two clones (Fig 4B). *CDK6*,  
223 but not *CDK4*, was significantly up-regulated in both clones and highest during the early burst  
224 (Blue) of proviral plus-strand expression. Both *CCND1* and *CCND2* were significantly up-  
225 regulated in clone 3.60, whereas the expression of *CCND1* was much lower in TBX4B;  
226 *CCND2* showed a trend of up-regulation, which was not significant. *CCND3* was significantly  
227 down-regulated during the early burst in both clones.

228 *CDK2* (active in G1/S and S phase) was up-regulated in both clones during early and mid-  
229 burst (Fig 4B). By contrast, the G1/S phase cyclins *CCNE1* and *CCNE2* differed between the  
230 clones. *CCNE1* was expressed at a low level, and its subsequent up-regulation was delayed  
231 until mid-burst in 3.60; its trajectory was inconclusive in TBX4B. By contrast, *CCNE2* was  
232 significantly up-regulated only in TBX4B. More importantly, the G1/S phase transcription factor  
233 E2F1 was significantly up-regulated in TBX4B and down-regulated in 3.60.

234 The pattern of cyclin expression progressively diverged between the clones as the cell cycle  
235 advanced (Fig 4B). The S-phase genes *CCNA1* and *CCNA2* were down-regulated in clone  
236 3.60, whereas *CCNA2* was up-regulated in TBX4B. Similar contrasts in expression were  
237 observed in mitotic cyclins *CCNB1*, *CCNB2*, *CDK1* kinase, and the mitotic phase transcription  
238 factor *FOXM1*. The expression level of many of these genes returned to the value seen in the  
239 silent phase by late burst, when proviral expression is terminating. This divergent gene  
240 expression of cell cycle regulators between the two clones demonstrates that two naturally  
241 infected T-cell clones can fundamentally differ in their response to proviral plus-strand  
242 expression.

### 243 III. Immediate up-regulation of genes involved in the DNA 244 damage response is followed by senescence markers

245 Several functions of Tax are associated with genomic instability, repression of DNA damage  
246 response and induction of senescence [53]. Our results indicated significant deregulation of  
247 *TP53*, which differed between two infected clones (Fig 5). This trajectory resembled that of  
248 the divergent cell-cycle mediators in Fig 4B. By contrast, we observed up-regulation of another  
249 p53 family member (*TP63*) and many known p53 targets: *GADD45B*, *GADD45A*, *GADD45G*,  
250 *CDKN1A* (*p21*), and the main DNA-damage sensor of global genome nucleotide excision  
251 repair (GG-NER) *XPC*. We also observed up-regulation of *CETN2* and *RAD23B*, which  
252 together with *XPC* form the recognition complex of GG-NER [54]. Previously it has been  
253 reported that NER is suppressed by the direct up-regulation of *PCNA* induced by Tax [55,56].  
254 *PCNA* was deregulated in both clones; however, the expression trajectories differed between  
255 the clones. The trajectories of two kinases activated by double-strand DNA breaks, *ATM* and  
256 *ATR*, differed in their response to plus-strand expression. *ATM* was significantly down-  
257 regulated in both clones, whereas *ATR* was up-regulated in clone 3.60 with a similar trend in  
258 TBX4B.

259 *CDKN1A*, which displayed a delayed up-regulation (Fig 5), belongs to the CIP/KIP family of  
260 CDK inhibitors. The CIP/KIP family gene *CDKN1C* (p57) was significantly up-regulated during  
261 the early transcriptional burst, with a higher level of expression in 3.60. The INK4 family of  
262 CDK inhibitor members, *CDKN2A* (p16) and *CDKN2B* (p15) were significantly down-regulated  
263 in both clones during proviral expression. In addition to *CDKN1A*, another senescence marker  
264 *GLB1* was up-regulated, peaking during mid-burst. These results indicate that DNA damage  
265 response pathways were activated during the burst, and the initial mitogenic signalling in G1  
266 (Fig 4) was accompanied by the parallel down-regulation of G1-phase CDK inhibitors.

267

268 **Fig 5. Up-regulation of DNA damage response and senescence markers.** Gene expression  
269 trajectories of cell cycle inhibitors, DNA damage response genes and senescence markers. Y-axis: normalized  
270 counts on log<sub>10</sub>-scale. Statistical significance was determined by LRT. FDR-corrected p-value < 0.01; ns - not  
271 significant

#### 272 IV. Proviral expression coincides with up-regulation of anti- 273 apoptotic mediators and down-regulation of apoptotic 274 effectors

275 Previous results have shown that Tax expression can promote cell death [23–27]. However,  
276 Tax has also been described to suppress apoptosis and this protection is transferable to cells  
277 not actively expressing Tax [15,16,20]. We observed a strong deregulation of key genes  
278 involved in the intrinsic and extrinsic apoptosis pathways during the plus-strand burst [57].

279 At the onset of the plus-strand burst, there was immediate downregulation of at least one of  
280 the pore-forming apoptotic factor genes in each clone (Fig 6). *BAX* was significantly down-  
281 regulated during the early-burst in clone 3.60, whereas a similar (yet non-significant) trend  
282 was seen in TBX4B. However, *BAK1* expression was sharply down-regulated only in clone  
283 TBX4B. The expression level of *BAK1* in clone 3.60 remained low during both the silent and  
284 early burst phases, but rebounded in the mid-burst and late burst.

285

286 **Fig 6. Temporal patterns of pro- and anti-apoptotic factors.** Gene expression trajectories of anti-  
287 and pro-apoptotic BCL2 family members, extrinsic apoptosis factors, anti-apoptotic and caspase genes. Y-axis:  
288 normalized counts on log<sub>10</sub>-scale. Statistical significance was determined by LRT. FDR-corrected p-value < 0.01;  
289 ns - not significant

290

291 Both clones showed strong up-regulation of the anti-apoptotic genes *BCL2*, *BCL2L1* and  
292 *BCL2L2*, which encode inhibitors of the pore-forming BCL2 family proteins (Fig 6). However,  
293 the pro-apoptotic genes *PMAIP1* (*NOXA*), *BCL2L11* (*BIM*) and *BMF* were also immediately  
294 up-regulated. The pro-apoptotic gene *BID* was significantly up-regulated during the early-burst  
295 in clone 3.60. Curiously, both *PMAIP1* and *BCL2L11* sustained a high expression throughout  
296 proviral reactivation and remained high in the termination phase.

297 The death receptors *FAS* and *TNFRSF10B* were up-regulated in both clones and *TNFRSF10A*  
298 was up-regulated during the mid-burst in 3.60 yet down-regulated in clone TBX4B (Fig 6).  
299 Their cognate ligands *FASLG* and *TNFSF10* were strongly down-regulated.

300 Although the intrinsic pathway initiator *CASP9* was up-regulated only in clone 3.60, the death-  
301 inducing signaling complex (DISC) member genes *CASP8* and *CASP10*, which are initiators  
302 of the extrinsic pathway, were down-regulated during the early burst. The primary effector  
303 *CASP3* was significantly downregulated over the course of proviral expression in clone 3.60,  
304 with a similar (albeit non-significant) trajectory in clone TBX4B. The inhibitors of apoptosis  
305 proteins capable of impairing caspase-mediated apoptosis - *BIRC2*, *BIRC3* and *CFLAR* (c-  
306 FLIP) - were strongly up-regulated in both clones.

307 A significant down-regulation of the granzyme genes *GZMA* and *GZMB* was also observed  
308 (S3 Fig). These genes are associated with cytotoxic activity of CD8<sup>+</sup> T-cells and NK cells; their  
309 function in CD4<sup>+</sup> T cells is incompletely understood.

310 These results showed that during the plus-strand burst the principal apoptotic effectors were  
311 down-regulated, and the apoptosis inhibitors up-regulated, in both extrinsic and intrinsic  
312 pathways. By contrast, a sustained expression of pro-apoptotic factor genes *PMAIP1* and  
313 *BCL2L11* outlasted the proviral burst.

314 V. Increased expression of non-canonical polycomb  
315 repressive complex 1 members coincides with the plus-  
316 strand burst

317 The factors that regulate the spontaneous onset of expression of the provirus are not fully  
318 understood, but include the proviral integration site [58], cell stress [20,59], AHR signaling [60],  
319 and ubiquitylation of histone 2A lysine 119 by polycomb repressive complex 1 (PRC1) [61].  
320 *RING1*, *RYBP* and *KDM2B* are members of the non-canonical PRC1 (ncPRC1) [62] and their  
321 expression was up-regulated during the burst (Fig 7). *BMI1* (PCGF4), which is a core member  
322 of the canonical PRC1, was down-regulated in both clones (Fig 7).

323

324 **Fig 7. Up-regulation of ncPRC1 members.** Gene expression trajectories of ncPRC1 and canonical  
325 PRC1 complex members. Y-axis: normalized counts on log<sub>10</sub>-scale. Statistical significance was determined by LRT.  
326 FDR-corrected p-value < 0.01.

327 VI. Aryl hydrocarbon receptor (AhR) signalling augments  
328 HTLV-1 plus-strand expression, but not reactivation.

329 We observed a consistent and robust differential expression of cytochrome P450 1A1  
330 (CYP1A1), a product of the AhR pathway, between the early burst and late burst populations  
331 in both clones (Figs S2-S3). AhR is a transcription factor that regulates many biological  
332 processes through its activation in response to metabolic and environmental signals [63,64].  
333 Following recent reports indicating enhanced HIV-1 proviral expression in response to AhR  
334 ligands in PBMCs isolated from patients on antiretroviral therapy [65] and HTLV-1 plus-strand  
335 expression in HTLV-1 infected transformed cell lines [60], we investigated the effect of AhR  
336 signalling on HTLV-1 expression in T-cell clones isolated from HTLV-1-infected individuals.

337 Endogenous AhR ligands such as tryptophan metabolites are present in the culture medium.  
338 We evaluated the effects of treatment with supplemental AhR ligands or AhR antagonists on  
339 HTLV-1 proviral expression using two patient-derived T-cell clones (3.60 and 11.50).  
340 Treatment with an endogenous AhR ligand, ITE [66], or a tryptophan-derived AhR ligand, FICZ  
341 [67] significantly increased Tax protein expression above background levels (Fig 8A). A  
342 purine-derived AhR antagonist StemRegenin 1 (SR1) [68] and a ligand-selective antagonist  
343 CH223191 [69] each substantially decreased Tax protein expression (Fig 8A). Transcription  
344 of the HTLV-1 plus-strand (*tax*) (Fig 8B) and AhR target genes (*CYP1A1* and *CYP1B1*) (Fig  
345 8D-E) was significantly induced by AhR agonists and suppressed by AhR antagonists. Neither  
346 AhR agonists nor antagonists altered the expression of the HTLV-1 minus-strand (*sHBZ*) (Fig  
347 8C).

348 **Fig 8. AhR signalling enhances HTLV-1 plus-strand expression.** (A) Two patient-derived HTLV-  
349 1 infected T -cell clones were treated with AhR agonists or antagonists or CYP1A1 inhibitor for 48 hours at the  
350 indicated concentrations. DMSO was used as the vehicle control. The percentage of plus-strand expressing cells  
351 among viable cells was quantified by Tax protein expression using flow cytometry. The bar plot depicts the mean  
352 and SEM from two independent experiments. Unpaired two-tailed t-tests were used to determine the significance  
353 of the difference between the vehicle control and the treatment conditions. \* P < 0.05, \*\* P < 0.01, \*\*\* P < 0.001.  
354 Expression levels of (B) *tax* (plus-strand), (C) *sHBZ* (minus-strand), AhR target genes (D) *CYP1A1* and (E) *CYP1B1*  
355 quantified by RT-qPCR after 24-hour treatment with DMSO, AhR activators or inhibitors or CYP1A1 inhibitor. Bar  
356 plots represent the mean and SEM from two independent experiments using two T-cell clones. \* P < 0.05, \*\* P <  
357 0.01, \*\*\* P < 0.001, \*\*\*\* P < 0.0001 (unpaired two-tailed t-test). Proviral (F) silencing and (G) reactivation kinetics  
358 in response to treatment with AhR agonists and antagonists. The data depict mean  $\pm$  SEM from two independent  
359 experiments using a single clone.

360

361 The significant upregulation of *CYP1A1* expression observed during the late burst raised the  
362 question whether *CYP1A1* itself contributes to the termination of HTLV-1 plus-strand  
363 expression (S1-S2 Data and S2-S3 Figs). However, treatment of the cells with  
364 Khellinoflavanone 4I (IIIM-517), an inhibitor of *CYP1A1* enzymatic activity [70], did not affect  
365 HTLV-1 plus-strand expression (Fig 8A-B). We conclude that the observed up-regulation of



366 CYP1A1 indicated activation of the AhR pathway, but CYP1A1 itself is not directly involved in  
367 the termination of HTLV-1 plus-strand burst.

368 We then investigated the effect of additional AhR ligands or inhibitors on HTLV-1 plus-strand  
369 reactivation and silencing dynamics using a patient-derived HTLV-1 infected T-cell clone  
370 (11.50) stably transduced with a Tax reporter construct that expresses a modified EGFP with  
371 a half-life of ~2h (d2EGFP). In these cells, the presence of d2EGFP is a surrogate for Tax  
372 protein expression. Live-cell imaging revealed that, compared with untreated cells, a greater  
373 portion of provirus-expressing cells terminated Tax expression in response to treatment with  
374 AhR antagonists (Fig 8F). Treatment with AhR agonists or a CYP1A1 inhibitor did not  
375 substantially affect proviral silencing or reactivation kinetics (Fig 8F, G). Spontaneous proviral  
376 reactivation was evident at early stages despite the presence of AhR inhibitors (Fig 8G).

377 These results indicate that enhanced AhR signalling augments and prolongs HTLV-1 plus-  
378 strand expression but is not the sole determinant of reactivation from latency in patient-derived  
379 T-cell clones.

380

381

382

383

384

385

386

387



## 388 Discussion

389 It is well established that the HTLV-1 viral transactivator Tax deregulates the transcription of  
390 many host genes. Both Tax and the minus-strand-encoded HTLV-1 bZIP factor HBZ have  
391 been frequently implicated in leukemogenesis. *Tax* expression occurs in intermittent  
392 transcriptional bursts [20,38], likely in order to limit exposure to the immune system and the  
393 cytotoxic effects of Tax protein. It remains unclear whether the impact of HTLV-1 on host  
394 transcription, including genes involved in proliferation and apoptosis are immediate and direct,  
395 or late and indirect consequences of proviral reactivation and plus-strand expression. In this  
396 study, a Tax-responsive Timer Protein construct was used to distinguish successive temporal  
397 phases of the spontaneous proviral transcriptional burst, to investigate the precise trajectory  
398 of expression of host genes involved in cell cycle regulation and apoptosis during the proviral  
399 plus-strand burst.

400

401 Two naturally-infected T-cell clones competent in the expression of Tax allowed us to identify  
402 both clone-independent and clone-dependent correlates of proviral plus-strand expression.  
403 Clone 3.60 has a deletion in the coding sequence of *env* on the plus-strand and in the 3'UTR  
404 of the minus-strand-encoded gene *HBZ* (S1 Fig). This deletion does not change the predicted  
405 protein sequence of HBZ, and the deleted sequence was absent from the HBZ expression  
406 construct used to investigate the protein-dependent and mRNA-dependent actions of *HBZ*  
407 [71]. However, it remains possible that this deletion influences the half-life or the physiological  
408 actions of *HBZ* mRNA.

409

410 Proviral expression deregulated a large number of host genes in each clone: 3851 genes were  
411 deregulated in both clones, which could be grouped into clusters defined by the trajectory of  
412 expression during the proviral plus-strand burst (Fig 3A). Tax activates both the canonical and  
413 non-canonical NF- $\kappa$ B pathways [72]. NF- $\kappa$ B pathway is persistently activated at the population  
414 level in transformed cell lines and primary ATL cells [73,74]. The present results confirm

415 immediate, clone-independent NF- $\kappa$ B activation during proviral plus-strand expression (Fig 2A  
416 and Fig 3 cluster 1), which is followed by the likely secondary effects of NF- $\kappa$ B activation (Fig  
417 3 cluster 2); both the immediate and later effects decreased during the termination of proviral  
418 expression (Fig 3 clusters 1-2). *TNF* itself was downregulated (S4 Fig): the observed up-  
419 regulation of genes in this enrichment term are likely to be the consequences of NF- $\kappa$ B  
420 activation by Tax. These observations suggest that high levels of NF- $\kappa$ B activation are  
421 confined to the active expression of Tax protein accompanying the plus-strand burst;  
422 constitutive activation of NF- $\kappa$ B may not be required for persistence in non-malignant HTLV-  
423 1-infected clones. We also confirmed the immediate up-regulation of *IL2RA* (Fig 2A), a known  
424 target of Tax, and genes in the “IL2-STAT5 signaling” enrichment term (Fig 3 cluster 1).

425

426 There was no consistent relationship between plus-strand and minus-strand expression of the  
427 provirus within each clone or between the clones (Fig 2A). The expression trajectory of the  
428 minus-strand resembled that of *SP1* (S3 Fig), a known regulator of *HBZ* expression [45].  
429 These results suggest that it is unlikely that Tax directly regulates the expression of HBZ or  
430 vice versa, and imply that the clone-independent responses to HTLV-1 proviral reactivation  
431 observed in this study are not regulated by HBZ during the plus-strand burst.

432

433 Tax is known to up-regulate the expression of several genes involved in cell cycle progression  
434 including *CCND1*, *CCND2*, *CDK4*, *CDK6*, *CDK2* and *E2F1* [75–80]. The present results  
435 demonstrate a clone-specific association between proviral plus-strand expression and the  
436 expression of genes involved in cell cycle regulation (Fig 3 cluster 4). There was a strong  
437 difference between the two clones in the expression of genes that peak in different cell cycle  
438 phases obtained from Cyclebase 3.0 database (Fig 4A). Increased expression of G1-phase  
439 cyclins *CCND1*, *CCND2* and kinase *CDK6* suggests that the cells are stimulated to enter the  
440 cell cycle in each clone. In line with this, G1-phase CDK inhibitors *CDKN2A* and *CDKN2B*  
441 were down-regulated (Fig 6). However, subsequent expression of G1/S, S and M phase genes  
442 *CCNE2*, *CCNA1*, *CCNA2*, *CCNB1*, *CCNB2* and *CDK1*, and key transcription factors that

443 regulate the cell cycle, *E2F1* and *FOXM1*, diverged between the clones progressively  
444 throughout the cell cycle (Fig 4B). These findings are consistent with previous observations  
445 on the same clones reported by [38]. Billman et al. showed that Tax-expressing cells were  
446 more abundant in G1 phase in clone 3.60 and in G2/M phase in clone TBX4B. We note that  
447 clone 3.60 also grows more slowly in cell culture. Although *E2F1* is up-regulated in response  
448 to Tax [76,77], the diverging trajectories of *E2F1* and its downstream targets indicate that the  
449 transcription of *E2F1* is unlikely to be directly activated by Tax (Fig 4B). These observations  
450 emphasize the natural heterogeneity of HTLV-1 infected T-cells and help to reconcile  
451 previously published diverging results on cell-cycle progression in HTLV-1-infected cells.

452

453 It has been proposed that the interplay between the effects of Tax in proliferation and the DNA  
454 damage response regulates the fate of Tax-expressing cells [53]. Tax expression causes  
455 double-strand breaks and activation of the DNA-damage response [5,29]; however, in the  
456 presence of additional genotoxic agents these pathways are impaired [53]. The activity of p53  
457 is also repressed in HTLV-1-infected cells, through mechanisms that do not involve its DNA-  
458 binding activity and intracellular localization [81]. Our results show that *TP53* itself is  
459 deregulated during the plus-strand burst: the trajectory differed between the clones, but  
460 expression returned to baseline in each clone after termination of the burst (Fig 5). There was  
461 consistent up-regulation of another p53 family gene, *TP63*, and p53 targets including the  
462 *GADD45* family members, *CDKN1A* and *XPC* (Fig 5). There was immediate up-regulation of  
463 genes involved in DNA damage response during the early burst of proviral expression,  
464 including *GADD45B*, *ATR* and global genome nucleotide excision repair (GG-NER) genes  
465 *RAD23B*, *XPC* and *CETN2* (Fig 5). However, *ATM* was down-regulated. *ATR* is known to  
466 respond to a wide range of DNA damage; the observed differences in expression between  
467 *ATR* and *ATM* in these clones indicates the presence of DNA damage other than double-  
468 stranded breaks. The up-regulation of DNA damage response genes was followed by the up-  
469 regulation of senescence markers *CDKN1A* and *GLB1*, which peaked during the mid-burst  
470 phase (Fig 5). Up-regulation of *CDKN1A* (p21) associated with hyperactivation of NF- $\kappa$ B by

471 Tax has been shown to cause cell senescence [14]; however, the present results indicate that  
472 the up-regulation of *CDKN1A* and *GLB1* occurs in the mid-burst phase of persistent Tax  
473 expression, yet reduces during the late phase of the burst. The results demonstrate temporal  
474 separation of the DNA damage response and up-regulation of senescence-related genes  
475 during the plus-strand burst, and that sustained proviral expression may result in reduced  
476 proliferative capacity of HTLV-1 infected cells.

477

478 Tax has been shown to deregulate both pro-apoptotic and anti-apoptotic genes [17–22].  
479 Consistent with this, both clones strongly up-regulated anti-apoptotic genes *BCL2*, *BCL2L1*,  
480 *BCL2L2*, *BIRC2*, *BIRC3*, *CFLAR* and *TNFAIP3*; and down-regulated key effectors of both the  
481 extrinsic and intrinsic apoptosis pathways: either *BAX* or *BAK1*, and *CASP3*, and down-  
482 regulated death receptor ligands *FASLG*, *TNFSF10*, *TNF* (Fig 6). Although the death receptor  
483 ligands were down-regulated, the death receptors *FAS* and *TNFRSF10* were up-regulated in  
484 both clones (Fig 6). These observations suggest that the deregulation of genes involved in the  
485 extrinsic and intrinsic pathways is an immediate – perhaps direct - effect of Tax. Sustained  
486 expression of Tax is toxic to cells, and the up-regulation of pro-apoptotic factors can partly  
487 explain this; however, the results presented here suggest that the strong up-regulation of anti-  
488 apoptotic factors can counteract the pro-apoptotic effect during proviral plus-strand  
489 expression. Curiously, we observed an up-regulation of pro-apoptotic factors *PMAIP1* and  
490 *BCL2L11* that was sustained throughout the transcriptional burst and termination phases,  
491 which may pose an increased risk of apoptosis after termination of the plus-strand burst.

492

493 HTLV-1 proviral latency is associated with the PRC1-mediated ubiquitylation of histone 2A  
494 lysine 119 (H2AK119ub1); inhibition of deubiquitylation represses proviral plus-strand  
495 reactivation [61]. Here, we observed the up-regulation of ncPRC1 members *RING1*, *RYBP*  
496 and *KDM2B* through the early and mid-burst phases of proviral expression (Fig 7). Conversely,  
497 a core component of the canonical PRC1, *BMI1* (PCGF4), was down-regulated. Targeted  
498 recruitment of PRC1 to non-methylated CpG islands is mediated by *KDM2B* [82], and *RYBP*

499 elevates the enzymatic ability of the PRC1 complex resulting in enhanced deposition of the  
500 H2AK119ub1 mark [83]. The up-regulation of these key PRC1 genes during proviral  
501 reactivation could be involved in the post-burst repression of proviral expression.

502

503 Up-regulation of genes involved in the inflammatory response and hypoxia (Fig 3, cluster 1) is  
504 consistent with the observation that cellular stress, including hypoxia, enhances proviral  
505 expression [20,59]. Although the hypoxia response observed by Kulkarni et al. was HIF-1-  
506 independent, we found that *HIF1A* was significantly up-regulated (S3 Fig).

507

508 Constitutive high expression of AhR, which is up-regulated in response to Tax, has been  
509 observed in ATL cells [84]. Recently, it was shown that persistent activation of NF- $\kappa$ B is  
510 important for the observed AHR expression: AhR signaling sustains and drives HTLV-1 plus-  
511 strand expression and can potentiate HTLV-1 reactivation from latency [60]. Consistent with  
512 a previous report [84], we saw expression of *AHR*, *ARNT* and direct targets of AhR activation  
513 (*CYP1B1*, *NQO1*) in the silent population of cells in both clones. By contrast, proviral plus-  
514 strand expression was not associated with increased expression of *AHR*, but instead was  
515 accompanied by the down-regulation of *AHR*, *ARNT* and down-stream genes (S3 Fig). The  
516 effects observed here of treatment with agonists or antagonists of AhR (Fig 8) and the down-  
517 regulation of genes involved in the AhR pathway during spontaneous HTLV-1 proviral  
518 reactivation (S3 Fig), suggest that AhR activation enhances and prolongs proviral plus-strand  
519 expression, but *AHR* is transcriptionally inhibited during spontaneous HTLV-1 plus-strand  
520 expression. The transcriptional inhibition of the AhR pathway during the proviral burst may  
521 limit the extent and duration of Tax expression.

522

523 HTLV-1 expression, and in particular the Tax protein, have been associated with many  
524 transcriptional changes in the infected host T cell. The results presented here make it possible  
525 to distinguish between the immediate effects of the HTLV-1 plus-strand burst on host  
526 transcription, and the delayed or secondary effects. These results also demonstrate both

527 clone-dependent and clone-independent transcriptional responses of the host cell  
528 accompanying the proviral plus-strand transcription. NF- $\kappa$ B was activated in response to  
529 HTLV-1 reactivation and this activation was contained to the duration of the proviral burst,  
530 which suggests NF- $\kappa$ B-mediated effects are not persistently active in clonal populations of  
531 naturally-infected T-cells. The regulation of genes responsible for progression through the cell  
532 cycle was clone-specific, emphasising the heterogeneity of naturally HTLV-1-infected T-cells.  
533 However, the up-regulation of genes involved in DNA damage recognition (GG-NER) and  
534 senescence were clone-independent, and associated with active expression of the provirus.  
535 Similarly, the transcriptional control of pro- and anti-apoptotic genes was consistent in the two  
536 clones and suggested a strong anti-apoptotic response that is limited to the duration of the  
537 burst; upregulation of certain pro-apoptotic genes outlasted the burst. We also observed the  
538 up-regulation of non-canonical PRC1 members, which are associated with the epigenetic  
539 regulation of the provirus [61]. In the context of these results, it will be important to verify the  
540 effects of this transcriptional regulation of host genes, on the dynamics of infected cells during  
541 and following the burst. Finally, we tested the involvement of the AhR pathway in proviral  
542 reactivation and found that while activation of the AhR pathway increased the intensity of the  
543 plus-strand burst, it did not increase the frequency of reactivation.

544

## 545 **Materials & methods**

### 546 **Cell culture**

547 The HTLV-1-infected clones used in this study were CD4+CD25+CCR4+ T cells, each  
548 carrying a single copy of the HTLV-1 provirus, derived from peripheral blood cells isolated  
549 from HTLV-1-infected individuals as described previously [40]. The clones were cultured in  
550 RPMI-1640 (Sigma-Aldrich) supplemented with 20% fetal bovine serum (FBS), 2 mM L-  
551 Glutamine, 50 IU/ml Penicillin, 50  $\mu$ g/ml Streptomycin (all from ThermoFisher Scientific) and

552 100 IU/ml human interleukin 2 (IL-2, Miltenyi Biotec). Ten micromolar integrase inhibitor,  
553 Raltegravir (Selleck Chemicals) was added to the cultures to prevent secondary HTLV-1  
554 infections. The cells were supplemented with IL-2 and Raltegravir twice-weekly intervals and  
555 cultured at 37°C, 5% CO<sub>2</sub>.

## 556 Plasmid Generation

557 To create pLJM1-LTR-FT, pLJM1-EGFP (Addgene 19319) was digested with NdeI and EcoRI  
558 to create the vector backbone. A forward primer (5'-ATGGTGAGCAAGGGCGAG-3') and a  
559 reverse primer (5'-TCGAGGTCGAGAATTCTTACTTGTACAGCTCGTCCATGC-3') with a 15  
560 base pair overlap with vector backbone were used in a polymerase chain reaction (PCR) to  
561 generate fast Timer protein timer fragment from plasmid pFast-FT-N1 (Addgene 31910). Five  
562 tandem repeats of Tax responsive element (TRE) type 2 and an HTLV-1 promoter was  
563 amplified from WT-Luc plasmid [85] by PCR using forward (5'-  
564 AAATGGACTATCATATGGGGAGGTACCGAGCTCTTACGC-3') and reverse (5'-  
565 GCCCTTGCTCACCATGGTGGCGGGCCAAGCCGGCAGTCA-3') primers with 15 base pair  
566 overlap with vector backbone and fast timer protein PCR product, respectively. Two PCR  
567 products were inserted into the vector backbone using In-Fusion HD Cloning Kit (Takara Bio)  
568 to generate pLJM1-LTR-FT. The sequence of the inserts was verified by Sanger sequencing  
569 (GATC Biotech).

570 pLJM1-LTR-d2EGFP was generated by digesting pLJM1-EGFP with NdeI and EcoRI to  
571 produce the vector backbone. A PCR incorporating a forward primer (5'-  
572 GCCACCATGGTGAGCAAGG-3') and a reverse primer (5'-  
573 TCGAGGTCGAGAATTCCTACACATTGATCCTAGCAGAAGC-3') with a 15 base pair overlap  
574 with vector backbone were used to amplify destabilised enhanced green fluorescent  
575 (d2EGFP) fragment from pcDNA3.3\_d2eGFP plasmid (Addgene 26821). A fragment  
576 containing 9 copies of TRE type 1 and TRE type 3 and an HTLV-1 promoter was amplified  
577 from SMPU-18x21-EGFP plasmid [86] by PCR using forward (5'-



578 AAATGGACTATCATATGCGGGTTTATTACAGGGACAGCG-3') and reverse (5'-  
579 GCTCACCATGGTGGCATCTCGCCAAGCTTGGATCTGT-3') primers with 15 base pair  
580 overlap with vector backbone and d2EGFP PCR product, respectively. pLJM1-LTR-d2EGFP  
581 was formed by inserting the two PCR products into the vector backbone using In-Fusion HD  
582 Cloning Kit. Sanger sequencing was used to verify the sequence of the inserts in the transfer  
583 plasmid.

584

## 585 Lentiviral Transduction

586 HEK 293T cells were seeded into 150 mm Corning TC-treated Culture Dishes (Corning) the  
587 day before transfection to reach an approximately 95% confluence on the day of transfection.  
588 HEK 293 T cells were co-transfected with either pLJM1-LTR-FT or pLJM1-LTR-d2EGFP,  
589 psPAX2 (Addgene 12260) and pCMV-VSV-G (Addgene 8454) plasmids using Lipofectamine  
590 3000 (Invitrogen) following the manufacturer's protocol. Viral supernatants were harvested 24  
591 and 52 hours post-transfection. Supernatants were centrifuged at 2000 rpm for 10 minutes  
592 and passed through a 0.45 µm syringe filter (Sartorius) to remove debris prior to concentration  
593 by ultracentrifugation at 25000 rpm for 2 hours at 4°C. One hundred thousand cells were  
594 spinoculated with 100 µl of concentrated viral supernatant in the presence of 8 µg/ml polybrene  
595 and 10 mM HEPES (Sigma-Aldrich) at 800 g, 32°C for 2 hours. Transduced cells were washed  
596 once and cultured in complete medium supplemented with IL-2. Three days post-transduction,  
597 the cultures were supplemented with Raltegravir and Puromycin Dihydrochloride  
598 (ThermoFisher Scientific) was added at 2 µg/ml twice a week for 14 days to select transduced  
599 cells. Timer protein or d2EGFP-positive cells were sorted by flow cytometry to obtain Timer  
600 protein or d2EGFP-expressing populations. Flow-sorted cultures returned to their steady state  
601 within two weeks of flow sorting. Replicates were grown in parallel. The cultures were  
602 maintained in 1 µg/ml Puromycin Dihydrochloride during the regular feeding cycle to prevent



603 the emergence of resistance gene silent populations. The transduced clones expressing two  
604 different Tax reporter systems are given in Table 1.

605 Table 1: Patient-derived T-cell clones expressing fluorescent protein-based Tax  
606 reporter systems

| Clone     | Tax reporter system |
|-----------|---------------------|
| TBX4B     | pLJM1-LTR-FT        |
| TBJ 3.60  | pLJM1-LTR-FT        |
| TBW 11.50 | pLJM1-LTR-d2EGFP    |

607

608

## 609 Flow cytometry analysis

610 Cells were washed once with PBS and stained with 1 µg/ml viability marker, LIVE/DEAD  
611 fixable near-IR (ThermoFisher Scientific) for 5 minutes and washed once in FACS buffer (PBS  
612 + 5% FCS), and fixed for 30 minutes with fixation/permeabilisation buffer of eBioscience  
613 FOXP3/Transcription Factor Staining Buffer Set (ThermoFisher Scientific). The cells were  
614 then washed with permeabilisation buffer, stained with 1 µg/ml anti-Tax mAb (Clone LT-4) in  
615 permeabilisation buffer for 30 minutes, washed twice in permeabilisation buffer, and  
616 resuspended in FACS buffer. A slightly modified staining protocol was used to co-detect Tax  
617 protein with timer protein. Following the staining with viability marker and subsequent wash,  
618 the cells were fixed with 4% formaldehyde (ThermoFisher Scientific) for 15 minutes, washed  
619 once in FACS buffer, permeabilised with 0.1% Triton X-100 (ThermoFisher Scientific) for 15  
620 minutes, washed once with FACS buffer and stained with 1 µg/ml anti-Tax mAb (Clone LT-4)  
621 in FACS buffer for 30 minutes. Finally, the cells were washed twice and resuspended in FACS  
622 buffer. All washes and incubations were performed at room temperature for flow cytometry

623 analysis and sorting. The cells were acquired on a BD LSRFortessa (BD Biosciences) flow  
624 cytometer. FlowJo software (BD Biosciences) was used to analyse flow cytometry data.

## 625 Flow sorting

626 Live cell flow cytometry sorting under containment level 3 (CL3) conditions was performed in  
627 the CL3 Cell Sorting Facility at Chelsea and Westminster Hospital in London. Cells were  
628 washed once with PBS and stained with 1 µg/ml LIVE/DEAD fixable near-IR viability dye for 5  
629 minutes, washed once and resuspended in RPMI 1640 without phenol red (ThermoFisher  
630 Scientific) supplemented with 2% FCS. Viable Blue<sup>-</sup>Red<sup>-</sup> (double negative, DN), Blue<sup>+</sup>Red<sup>-</sup>,  
631 Blue<sup>+</sup>Red<sup>+</sup> (double positive, DP), Blue<sup>-</sup>Red<sup>+</sup> or viable d2EGFP<sup>+</sup> and d2EGFP<sup>-</sup> cells were  
632 sorted under sterile conditions using a BD FACSAria III cell sorter. Duplicate parallel cultures  
633 from each timer protein Tax reporter clone were flow-sorted on the same day. RNeasy Plus  
634 Micro Kit (Qiagen) was used to extract RNA from the flow-sorted timer protein sub-populations  
635 following the manufacturer's protocol. RNA integrity was quantified using RNA 6000 Pico Kit  
636 (Agilent) on a 2100 Bioanalyzer (Agilent).

## 637 Live-cell imaging

638 Flow-sorted proviral-expressing (d2EGFP<sup>+</sup>) and non-expressing (d2EGFP<sup>-</sup>) cells were seeded  
639 into a 96 well plate pre-coated with 1 mg/ml Poly-D-Lysine (PDL, Merck). Aryl hydrocarbon  
640 receptor (AhR) agonists and antagonists were added at concentrations indicated in Figure 8.  
641 One hundred nanomolar YOYO-3 Iodide (ThermoFisher Scientific) was added to label dead  
642 cells. Live-cell imaging was performed using Incucyte S3 (Sartorius) live-cell imaging system  
643 capturing 9 Phase contrast, green and red fluorescent images per well every 6 hours using a  
644 20x objective. Image analysis was performed with the "Non-adherent Cell-by-Cell" image

645 analysis module on the Incucyte, using the parameters listed in Table 2. The percentage of  
646 viable cells that were d2EGFP positive was calculated.

647 Table 2: Imaging and mask parameters used for image capturing and analysis on  
648 Incucyte S3

| Channel | Target        | Exposure time | Background fluorescence correction method | Segmentation parameters                                                                                                                     |
|---------|---------------|---------------|-------------------------------------------|---------------------------------------------------------------------------------------------------------------------------------------------|
| Phase   | All cells     | Not available | Not applicable                            | Sensitivity (Threshold = 9, Background = 10, Edge = 10, Particle area (minimum = 30 $\mu\text{m}^2$ , maximum = $\infty$ $\mu\text{m}^2$ )) |
| Green   | d2EGFP+ Cells | 300 ms        | Top-Hat (50 $\mu\text{m}$ radius)         | Not applicable                                                                                                                              |
| Red     | Dead cells    | 400 ms        | Top-Hat (50 $\mu\text{m}$ radius)         | Not applicable                                                                                                                              |

649

## 650 Quantitative real-time PCR

651 RNeasy Plus Mini kit (Qiagen) was used to extract RNA from cells cultured with vehicle control  
652 (DMSO), or AhR agonists or antagonists. RNA was reverse-transcribed using Transcriptor  
653 First Strand cDNA Synthesis Kit (Roche) with random hexamer primers following  
654 manufacturer's instructions. A no-reverse transcriptase (RT) control was included for each  
655 sample to verify the elimination of genomic DNA from RNA samples. RNA transcripts were  
656 amplified with a master mix containing gene-specific primers listed in Table 3 and Fast SYBR  
657 Green Master Mix (ThermoFisher Scientific) on a Viiia 7 Real-Time PCR System

658 (ThermoFisher Scientific). The relative quantification of target mRNAs was performed using  
659 the LinRegPCR method [87], and the data were normalised against the internal PCR control,  
660 18S rRNA.

661 Table 3: Gene-specific primers used for RT-qPCR

| Target gene   | Orientation | Sequence                         | Reference |
|---------------|-------------|----------------------------------|-----------|
| <i>tax</i>    | Forward     | 5'-<br>CCGGCGCTGCTCTCATCCCGGT-3' | [88]      |
|               | Reverse     | 5'-<br>GGCCGAACATAGTCCCCCAGAG-3' |           |
| <i>sHBZ</i>   | Forward     | 5'-GGACGCAGTTCAGGAGGCAC-3'       | [89]      |
|               | Reverse     | 5'-CCTCCAAGGATAATAGCCCG-3'       |           |
| <i>18S</i>    | Forward     | 5'-GTAACCCGTTGAACCCATT-3'        |           |
|               | Reverse     | 5'-CCATCCAATCGGTAGTAGCG-3'       |           |
| <i>CYP1A1</i> | Forward     | 5'-CACCATCCCCACAGCAC-3'          |           |
|               | Reverse     | 5'-ACAAAGACACAACGCCCTT-3'        |           |
| <i>CYP1B1</i> | Forward     | 5'-GCTGCAGTGGCTGCTCCT-3'         |           |
|               | Reverse     | 5'-CCCACGACCTGATCCAATTCT-3'      |           |

662

## 663 Statistical analysis

664 Statistical analysis was performed using GraphPad Prism (GraphPad Software) and in R [90].

## 665 RNA-seq Alignment and quantification

666 Paired-end 150 bp poly-A enriched stranded RNA libraries were prepared with NEBNext Ultra  
667 II Directional RNA Library Prep Kit for Illumina. Reads were sequenced on the Illumina's HiSeq  
668 4000 Sequencing System by Oxford Genomics Centre. Samples were sequenced in two lanes

669 and the resulting FASTQ files aggregated for each sample. FastQC (RRID:SCR\_014583,  
670 version 0.11.8) and MultiQC (RRID:SCR\_014982, version 1.8) were used for quality  
671 assessment before and after adapter and quality trimming with Trim Galore  
672 (RRID:SCR\_011847, version 0.6.4\_dev). The STAR aligner (RRID:SCR\_004463, version  
673 2.7.3a) was used to align reads against a custom merged reference of the human (Ensembl100  
674 GRCh38) genome [91], HTLV-1 (GenBank: AB513134) genome and the reference sequence  
675 of the Timer protein. A custom gene transfer format (GTF) including coordinates for the Timer  
676 protein and HTLV-1 was also supplied for STAR to transform the alignments into transcript  
677 coordinates (--quantMode TranscriptomeSAM). RSEM (RRID:SCR\_013027, version 1.3.1)  
678 was then used for transcript quantification of stranded aligned reads ( --forward-prob 0 )[92].

## 679 Differential expression analysis

680 Tximport (RRID:SCR\_016752, version 1.14.2) was used to import gene level transcript  
681 abundance estimates for differential expression analysis using DESeq2 (RRID:SCR\_015687,  
682 version 1.32.0) in R (version 4.1.2) [90,93,94]. Each clone was analysed separately, and reads  
683 with < 3 counts in at least two samples were removed. The LRT was used to identify  
684 significantly DE genes across all Timer protein populations; for pairwise comparisons the  
685 default Wald test was used. FDR adjusted p-value < 0.01 cut-off was used for both approaches  
686 [95].

## 687 K-means clustering

688 K-means clustering (using MacQueen algorithm) with k=5 was carried out in R on the subset  
689 of DE genes that overlapped in the two clones [90]. A joined matrix of the scaled variance-  
690 stabilizing transformation (VST) transformed counts was used as input [96].

## 691 Over-representation analysis

692 Over-representation analysis (ORA) was performed with g:Profiler (RRID:SCR\_006809,  
693 version 0.2.0) against the MSigDB's Hallmark gene set collection [97,52]. A custom  
694 background of all genes that were subjected to differential expression testing in both clones  
695 was used.

## 696 **Acknowledgments**

697

698 We thank Parisa Amjadi from the CL3 Cell Sorting Facility at The Centre for Immunology and  
699 Vaccinology at Imperial College London. We thank Oxford Genomics Centre for library  
700 preparation and RNA Sequencing. We thank Chou-Zen Giam (Uniformed Services University)  
701 for providing the SMPU-18x21-EGFP plasmid; Brigitta Stockinger (Crick Institute) for providing  
702 FICZ and helpful discussions; and Sandip Bharate (Indian Institute of Integrative Medicine) for  
703 providing CYP1A1 inhibitor, IIM-517. We thank Imperial College Research Computing  
704 Service for use of the high-performance computing cluster (DOI: 10.14469/hpc/2232).

## 705        **References**

- 706        1.    Gessain A, Cassar O. Epidemiological Aspects and World Distribution of HTLV-1  
707            Infection. *Front Microbiol.* 2012;3: 388. doi:10.3389/fmicb.2012.00388
- 708        2.    Bangham CRM. Human T Cell Leukemia Virus Type 1: Persistence and Pathogenesis.  
709            *Annu Rev Immunol.* 2018;36: 43–71. doi:10.1146/annurev-immunol-042617-053222
- 710        3.    Matsuoka M, Mesnard J-M. HTLV-1 bZIP factor: the key viral gene for pathogenesis.  
711            *Retrovirology.* 2020;17: 2. doi:10.1186/s12977-020-0511-0
- 712        4.    Mohanty S, Harhaj EW. Mechanisms of Oncogenesis by HTLV-1 Tax. *Pathogens.*  
713            2020;9: 543. doi:10.3390/pathogens9070543
- 714        5.    Boxus M, Twizere J-C, Legros S, Kettmann R, Willems L. Interaction of HTLV-1 Tax with  
715            minichromosome maintenance proteins accelerates the replication timing program.  
716            *Blood.* 2012;119: 151–160. doi:10.1182/blood-2011-05-356790
- 717        6.    Lemoine FJ, Marriott SJ. Accelerated G1 Phase Progression Induced by the Human T  
718            Cell Leukemia Virus Type I (HTLV-I) Tax Oncoprotein \*. *J Biol Chem.* 2001;276: 31851–  
719            31857. doi:10.1074/jbc.M105195200
- 720        7.    Neuveut C, Low KG, Maldarelli F, Schmitt I, Majone F, Grassmann R, et al. Human T-  
721            Cell Leukemia Virus Type 1 Tax and Cell Cycle Progression: Role of Cyclin D-cdk and  
722            p110Rb. *Mol Cell Biol.* 1998;18: 3620–3632. doi:10.1128/MCB.18.6.3620
- 723        8.    Schmitt I, Rosin O, Rohwer P, Gossen M, Grassmann R. Stimulation of Cyclin-  
724            Dependent Kinase Activity and G1- to S-Phase Transition in Human Lymphocytes by the  
725            Human T-Cell Leukemia/Lymphotropic Virus Type 1 Tax Protein. *J Virol.* 1998;72: 633–  
726            640. doi:10.1128/JVI.72.1.633-640.1998
- 727        9.    Sibon D, Gabet A-S, Zandecki M, Pinatel C, Thête J, Delfau-Larue M-H, et al. HTLV-1  
728            propels untransformed CD4+ lymphocytes into the cell cycle while protecting CD8+ cells  
729            from death. *J Clin Invest.* 2006;116: 974–983. doi:10.1172/JCI27198
- 730        10.    Asquith B, Zhang Y, Mosley AJ, Lara CM de, Wallace DL, Worth A, et al. In vivo T  
731            lymphocyte dynamics in humans and the impact of human T-lymphotropic virus 1  
732            infection. *Proc Natl Acad Sci.* 2007;104: 8035–8040. doi:10.1073/pnas.0608832104
- 733        11.    Kuo Y-L, Giam C-Z. Activation of the anaphase promoting complex by HTLV-1 tax leads  
734            to senescence. *EMBO J.* 2006;25: 1741–1752. doi:10.1038/sj.emboj.7601054
- 735        12.    Liang M-H, Geisbert T, Yao Y, Hinrichs SH, Giam C-Z. Human T-Lymphotropic Virus  
736            Type 1 Oncoprotein Tax Promotes S-Phase Entry but Blocks Mitosis. *J Virol.* 2002;76:  
737            4022–4033. doi:10.1128/JVI.76.8.4022-4033.2002
- 738        13.    Liu M, Yang L, Zhang L, Liu B, Merling R, Xia Z, et al. Human T-Cell Leukemia Virus  
739            Type 1 Infection Leads to Arrest in the G1 Phase of the Cell Cycle. *J Virol.* 2008;82:



- 740 8442–8455. doi:10.1128/JVI.00091-08
- 741 14. Zhi H, Yang L, Kuo Y-L, Ho Y-K, Shih H-M, Giam C-Z. NF- $\kappa$ B Hyper-Activation by HTLV-1  
742 Tax Induces Cellular Senescence, but Can Be Alleviated by the Viral Anti-Sense Protein  
743 HBZ. *PLOS Pathog.* 2011;7: e1002025. doi:10.1371/journal.ppat.1002025
- 744 15. Copeland KF, Haaksma AG, Goudsmit J, Krammer PH, Heeney JL. Inhibition of  
745 apoptosis in T cells expressing human T cell leukemia virus type I Tax. *AIDS Res Hum*  
746 *Retroviruses.* 1994;10: 1259–1268. doi:10.1089/aid.1994.10.1259
- 747 16. Kawakami A, Nakashima T, Sakai H, Urayama S, Yamasaki S, Hida A, et al. Inhibition  
748 of Caspase Cascade by HTLV-I Tax Through Induction of NF- $\kappa$ B Nuclear Translocation.  
749 *Blood.* 1999;94: 3847–3854. doi:10.1182/blood.V94.11.3847
- 750 17. Brauweiler A, Garrus JE, Reed JC, Nyborg JK. Repression of Bax Gene Expression by  
751 the HTLV-I Tax Protein: Implications for Suppression of Apoptosis in Virally Infected  
752 Cells. *Virology.* 1997;231: 135–140. doi:10.1006/viro.1997.8509
- 753 18. Mühleisen A, Giaisi M, Köhler R, Krammer PH, Li-Weber M. Tax contributes apoptosis  
754 resistance to HTLV-1-infected T cells via suppression of Bid and Bim expression. *Cell*  
755 *Death Dis.* 2014;5: e1575. doi:10.1038/cddis.2014.536
- 756 19. Krueger A, Fas SC, Giaisi M, Bleumink M, Merling A, Stumpf C, et al. HTLV-1 Tax  
757 protects against CD95-mediated apoptosis by induction of the cellular FLICE-inhibitory  
758 protein (c-FLIP). *Blood.* 2006;107: 3933–3939. doi:10.1182/blood-2005-06-2567
- 759 20. Mahgoub M, Yasunaga J-I, Iwami S, Nakaoka S, Koizumi Y, Shimura K, et al. Sporadic  
760 on/off switching of HTLV-1 Tax expression is crucial to maintain the whole population of  
761 virus-induced leukemic cells. *Proc Natl Acad Sci U S A.* 2018;115: E1269–E1278.  
762 doi:10.1073/pnas.1715724115
- 763 21. Tsukahara T, Kannagi M, Ohashi T, Kato H, Arai M, Nunez G, et al. Induction of Bcl-xL  
764 Expression by Human T-Cell Leukemia Virus Type 1 Tax through NF- $\kappa$ B in Apoptosis-  
765 Resistant T-Cell Transfectants with Tax. *J Virol.* 1999;73: 7981–7987.  
766 doi:10.1128/JVI.73.10.7981-7987.1999
- 767 22. Wäldele K, Silbermann K, Schneider G, Ruckes T, Cullen BR, Grassmann R.  
768 Requirement of the human T-cell leukemia virus (HTLV-1) tax-stimulated HIAP-1 gene  
769 for the survival of transformed lymphocytes. *Blood.* 2006;107: 4491–4499.  
770 doi:10.1182/blood-2005-08-3138
- 771 23. Chen X, Zachar V, Zdravkovic M, Guo M, Ebbesen P, Liu X. Role of the Fas/Fas ligand  
772 pathway in apoptotic cell death induced by the human T cell lymphotropic virus type I  
773 Tax transactivator. *J Gen Virol.* 1997;78 ( Pt 12): 3277–3285. doi:10.1099/0022-1317-  
774 78-12-3277
- 775 24. Chlichlia K, Busslinger M, Peter ME, Walczak H, Krammer PH, Schirmacher V, et al.  
776 ICE-proteases mediate HTLV-I Tax-induced apoptotic T-cell death. *Oncogene.* 1997;14:

- 777 2265–2272. doi:10.1038/sj.onc.1201070
- 778 25. Rivera-Walsh I, Waterfield M, Xiao G, Fong A, Sun S-C. NF- $\kappa$ B Signaling Pathway  
779 Governs TRAIL Gene Expression and Human T-cell Leukemia Virus-I Tax-induced T-  
780 cell Death \*. *J Biol Chem*. 2001;276: 40385–40388. doi:10.1074/jbc.C100501200
- 781 26. Kao S-Y, Lemoine FJ, Marriott SJ. p53-Independent Induction of Apoptosis by the HTLV-I  
782 Tax Protein Following UV Irradiation. *Virology*. 2001;291: 292–298.  
783 doi:10.1006/viro.2001.1200
- 784 27. Kao S-Y, Lemoine FJ, Marriott SJ. HTLV-1 Tax protein sensitizes cells to apoptotic cell  
785 death induced by DNA damaging agents. *Oncogene*. 2000;19: 2240–2248.  
786 doi:10.1038/sj.onc.1203559
- 787 28. Cereseto A, Diella F, Mulloy JC, Cara A, Michieli P, Grassmann R, et al. p53 Functional  
788 Impairment and High p21waf1/cip1 Expression in Human T-Cell Lymphotropic/Leukemia  
789 Virus Type I -Transformed T Cells. *Blood*. 1996;88: 1551–1560.  
790 doi:10.1182/blood.V88.5.1551.1551
- 791 29. Baydoun HH, Bai XT, Shelton S, Nicot C. HTLV-I Tax Increases Genetic Instability by  
792 Inducing DNA Double Strand Breaks during DNA Replication and Switching Repair to  
793 NHEJ. *PLOS ONE*. 2012;7: e42226. doi:10.1371/journal.pone.0042226
- 794 30. Durkin SS, Guo X, Fryrear KA, Mihaylova VT, Gupta SK, Belgnaoui SM, et al. HTLV-1  
795 Tax Oncoprotein Subverts the Cellular DNA Damage Response via Binding to DNA-  
796 dependent Protein Kinase\*. *J Biol Chem*. 2008;283: 36311–36320.  
797 doi:10.1074/jbc.M804931200
- 798 31. He Y, Pasupala N, Zhi H, Dorjbal B, Hussain I, Shih H-M, et al. NF- $\kappa$ B–induced R-loop  
799 accumulation and DNA damage select for nucleotide excision repair deficiencies in adult  
800 T cell leukemia. *Proc Natl Acad Sci*. 2021;118: e2005568118–e2005568118.  
801 doi:10.1073/pnas.2005568118
- 802 32. Kinjo T, Ham-Terhune J, Peloponese J-M, Jeang K-T. Induction of Reactive Oxygen  
803 Species by Human T-Cell Leukemia Virus Type 1 Tax Correlates with DNA Damage and  
804 Expression of Cellular Senescence Marker. *J Virol*. 2010;84: 5431–5437.  
805 doi:10.1128/JVI.02460-09
- 806 33. Basbous J, Arpin C, Gaudray G, Piechaczyk M, Devaux C, Mesnard J-M. The HBZ  
807 Factor of Human T-cell Leukemia Virus Type I Dimerizes with Transcription Factors JunB  
808 and c-Jun and Modulates Their Transcriptional Activity\*. *J Biol Chem*. 2003;278: 43620–  
809 43627. doi:10.1074/jbc.M307275200
- 810 34. Gaudray G, Gachon F, Basbous J, Biard-Piechaczyk M, Devaux C, Mesnard J-M. The  
811 Complementary Strand of the Human T-Cell Leukemia Virus Type 1 RNA Genome  
812 Encodes a bZIP Transcription Factor That Down-Regulates Viral Transcription. *J Virol*.  
813 2002;76: 12813–12822. doi:10.1128/JVI.76.24.12813-12822.2002

- 814 35. Lemasson I, Lewis MR, Polakowski N, Hivin P, Cavanagh M-H, Thébault S, et al. Human  
815 T-Cell Leukemia Virus Type 1 (HTLV-1) bZIP Protein Interacts with the Cellular  
816 Transcription Factor CREB To Inhibit HTLV-1 Transcription. *J Virol.* 2007;81: 1543–  
817 1553. doi:10.1128/JVI.00480-06
- 818 36. Matsumoto A, Uesono Y. Physicochemical Solubility of and Biological Sensitivity to Long-  
819 Chain Alcohols Determine the Cutoff Chain Length in Biological Activity. *Mol Pharmacol.*  
820 2018;94: 1312–1320. doi:10.1124/mol.118.112656
- 821 37. Zhao T, Yasunaga J, Satou Y, Nakao M, Takahashi M, Fujii M, et al. Human T-cell  
822 leukemia virus type 1 bZIP factor selectively suppresses the classical pathway of NF-κB.  
823 *Blood.* 2009;113: 2755–2764. doi:10.1182/blood-2008-06-161729
- 824 38. Billman MR, Rueda D, Bangham CRM. Single-cell heterogeneity and cell-cycle-related  
825 viral gene bursts in the human leukaemia virus HTLV-1. *Wellcome Open Res.* 2017;2:  
826 87. doi:10.12688/wellcomeopenres.12469.2
- 827 39. Miura M, Dey S, Ramanayake S, Singh A, Rueda DS, Bangham CRM. Kinetics of HTLV-  
828 1 reactivation from latency quantified by single-molecule RNA FISH and stochastic  
829 modelling. *PLOS Pathog.* 2019;15: e1008164. doi:10.1371/journal.ppat.1008164
- 830 40. Cook LB, Rowan AG, Melamed A, Taylor GP, Bangham CRM. HTLV-1–infected T cells  
831 contain a single integrated provirus in natural infection. *Blood.* 2012;120: 3488–3490.  
832 doi:10.1182/blood-2012-07-445593
- 833 41. Subach FV, Subach OM, Gundorov IS, Morozova KS, Piatkevich KD, Cuervo AM, et al.  
834 Monomeric fluorescent timers that change color from blue to red report on cellular  
835 trafficking. *Nat Chem Biol.* 2009;5: 118–126. doi:10.1038/nchembio.138
- 836 42. Bending D, Prieto Martín P, Paduraru A, Ducker C, Marzaganov E, Laviro M, et al. A  
837 timer for analyzing temporally dynamic changes in transcription during differentiation in  
838 vivo. *J Cell Biol.* 2018;217: 2931–2950. doi:10.1083/jcb.201711048
- 839 43. Bending D, Paduraru A, Ducker CB, Prieto Martín P, Crompton T, Ono M. A temporally  
840 dynamic Foxp3 autoregulatory transcriptional circuit controls the effector Treg  
841 programme. *EMBO J.* 2018;37: e99013. doi:10.15252/embj.201899013
- 842 44. Rende F, Cavallari I, Corradin A, Silic-Benussi M, Toulza F, Toffolo GM, et al. Kinetics  
843 and intracellular compartmentalization of HTLV-1 gene expression: nuclear retention of  
844 HBZ mRNAs. *Blood.* 2011;117: 4855–4859. doi:10.1182/blood-2010-11-316463
- 845 45. Yoshida M, Satou Y, Yasunaga J, Fujisawa J, Matsuoka M. Transcriptional Control of  
846 Spliced and Unspliced Human T-Cell Leukemia Virus Type 1 bZIP Factor (HBZ) Gene.  
847 *J Virol.* 2008 [cited 22 Dec 2021]. doi:10.1128/JVI.00242-08
- 848 46. Chung H-K, Young HA, Goon PKC, Heidecker G, Princler GL, Shimozato O, et al.  
849 Activation of interleukin-13 expression in T cells from HTLV-1-infected individuals and in  
850 chronically infected cell lines. *Blood.* 2003;102: 4130–4136. doi:10.1182/blood-2003-04-

- 851 1043
- 852 47. Fujii M, Niki T, Mori T, Matsuda T, Matsui M, Nomura N, et al. HTLV-1 Tax induces  
853 expression of various immediate early serum responsive genes. *Oncogene*. 1991;6:  
854 1023–1029.
- 855 48. Hieshima K, Nagakubo D, Nakayama T, Shirakawa A-K, Jin Z, Yoshie O. Tax-inducible  
856 production of CC chemokine ligand 22 by human T cell leukemia virus type 1 (HTLV-1)-  
857 infected T cells promotes preferential transmission of HTLV-1 to CCR4-expressing CD4+  
858 T cells. *J Immunol Baltim Md 1950*. 2008;180: 931–939. doi:10.4049/jimmunol.180.2.931
- 859 49. Inoue J, Seiki M, Taniguchi T, Tsuru S, Yoshida M. Induction of interleukin 2 receptor  
860 gene expression by p40x encoded by human T-cell leukemia virus type 1. *EMBO J*.  
861 1986;5: 2883–2888.
- 862 50. Lemasson I, Robert-Hebmann V, Hamaia S, Duc Dodon M, Gazzolo L, Devaux C.  
863 Transrepression of Ick gene expression by human T-cell leukemia virus type 1-encoded  
864 p40tax. *J Virol*. 1997;71: 1975–1983. doi:10.1128/JVI.71.3.1975-1983.1997
- 865 51. Jiang H, Lu H, Schiltz RL, Pise-Masison CA, Ogryzko VV, Nakatani Y, et al. PCAF  
866 Interacts with Tax and Stimulates Tax Transactivation in a Histone Acetyltransferase-  
867 Independent Manner. *Mol Cell Biol*. 1999 [cited 8 Feb 2022].  
868 doi:10.1128/MCB.19.12.8136
- 869 52. Liberzon A, Birger C, Thorvaldsdóttir H, Ghandi M, Mesirov JP, Tamayo P. The Molecular  
870 Signatures Database Hallmark Gene Set Collection. *Cell Syst*. 2015;1: 417–425.  
871 doi:10.1016/j.cels.2015.12.004
- 872 53. Boxus M, Willems L. How the DNA damage response determines the fate of HTLV-1  
873 Tax-expressing cells. *Retrovirology*. 2012;9: 2–2. doi:10.1186/1742-4690-9-2
- 874 54. Kusakabe M, Onishi Y, Tada H, Kurihara F, Kusao K, Furukawa M, et al. Mechanism  
875 and regulation of DNA damage recognition in nucleotide excision repair. *Genes Environ*.  
876 2019;41: 2. doi:10.1186/s41021-019-0119-6
- 877 55. Kao S-Y, Lemoine FJ, Marriott SJ. Suppression of DNA Repair by Human T Cell  
878 Leukemia Virus Type 1 Tax Is Rescued by a Functional p53 Signaling Pathway \*. *J Biol*  
879 *Chem*. 2000;275: 35926–35931. doi:10.1074/jbc.M004397200
- 880 56. Kao S-Y, Marriott SJ. Disruption of Nucleotide Excision Repair by the Human T-Cell  
881 Leukemia Virus Type 1 Tax Protein. *J Virol*. 1999;73: 4299–4304.  
882 doi:10.1128/JVI.73.5.4299-4304.1999
- 883 57. Galluzzi L, Vitale I, Aaronson SA, Abrams JM, Adam D, Agostinis P, et al. Molecular  
884 mechanisms of cell death: recommendations of the Nomenclature Committee on Cell  
885 Death 2018. *Cell Death Differ*. 2018;25: 486–541. doi:10.1038/s41418-017-0012-4
- 886 58. Melamed A, Laydon DJ, Gillet NA, Tanaka Y, Taylor GP, Bangham CRM. Genome-wide  
887 Determinants of Proviral Targeting, Clonal Abundance and Expression in Natural HTLV-1

- 888 Infection. *PLOS Pathog.* 2013;9: e1003271. doi:10.1371/journal.ppat.1003271
- 889 59. Kulkarni A, Mateus M, Thinnés CC, McCullagh JS, Schofield CJ, Taylor GP, et al.  
890 Glucose Metabolism and Oxygen Availability Govern Reactivation of the Latent Human  
891 Retrovirus HTLV-1. *Cell Chem Biol.* 2017;24: 1377-1387.e3.  
892 doi:10.1016/j.chembiol.2017.08.016
- 893 60. Hong W, Cheng W, Zheng T, Jiang N, Xu R. AHR is a tunable knob that controls HTLV-  
894 1 latency-reactivation switching. Harhaj EW, editor. *PLOS Pathog.* 2020;16: e1008664–  
895 e1008664. doi:10.1371/journal.ppat.1008664
- 896 61. Kulkarni A, Taylor GP, Klose RJ, Schofield CJ, Bangham CR. Histone H2A  
897 monoubiquitylation and p38-MAPKs regulate immediate-early gene-like reactivation of  
898 latent retrovirus HTLV-1. *JCI Insight.* 2018;3: 123196. doi:10.1172/jci.insight.123196
- 899 62. Cohen I, Bar C, Ezhkova E. Activity of PRC1 and Histone H2AK119 Monoubiquitination:  
900 Revising Popular Misconceptions. *BioEssays.* 2020;42: 1900192.  
901 doi:10.1002/bies.201900192
- 902 63. Harper PA, Riddick DS, Okey AB. Regulating the regulator: Factors that control levels  
903 and activity of the aryl hydrocarbon receptor. *Biochem Pharmacol.* 2006;72: 267–279.  
904 doi:10.1016/j.bcp.2006.01.007
- 905 64. Rothhammer V, Quintana FJ. The aryl hydrocarbon receptor: an environmental sensor  
906 integrating immune responses in health and disease. *Nat Rev Immunol.* 2019;19: 184–  
907 197. doi:10.1038/s41577-019-0125-8
- 908 65. Zhou Y-H, Sun L, Chen J, Sun W-W, Ma L, Han Y, et al. Tryptophan Metabolism  
909 Activates Aryl Hydrocarbon Receptor-Mediated Pathway To Promote HIV-1 Infection and  
910 Reactivation. *mBio.* 2019 [cited 2 Feb 2022]. doi:10.1128/mBio.02591-19
- 911 66. Song J, Clagett-Dame M, Peterson RE, Hahn ME, Westler WM, Sicinski RR, et al. A  
912 ligand for the aryl hydrocarbon receptor isolated from lung. *Proc Natl Acad Sci U S A.*  
913 2002;99: 14694–14699. doi:10.1073/pnas.232562899
- 914 67. Rannug U, Rannug A, Sjöberg U, Li H, Westerholm R, Bergman J. Structure elucidation  
915 of two tryptophan-derived, high affinity Ah receptor ligands. *Chem Biol.* 1995;2: 841–845.  
916 doi:10.1016/1074-5521(95)90090-x
- 917 68. Boitano AE, Wang J, Romeo R, Bouchez LC, Parker AE, Sutton SE, et al. Aryl  
918 hydrocarbon receptor antagonists promote the expansion of human hematopoietic stem  
919 cells. *Science.* 2010;329: 1345–1348. doi:10.1126/science.1191536
- 920 69. Zhao B, Degroot DE, Hayashi A, He G, Denison MS. CH223191 is a ligand-selective  
921 antagonist of the Ah (Dioxin) receptor. *Toxicol Sci Off J Soc Toxicol.* 2010;117: 393–403.  
922 doi:10.1093/toxsci/kfq217
- 923 70. Sharma R, Williams IS, Gatchie L, Sonawane VR, Chaudhuri B, Bharate SB.  
924 Khellinoflavanone, a Semisynthetic Derivative of Khellin, Overcomes Benzo[a]pyrene



- 925 Toxicity in Human Normal and Cancer Cells That Express CYP1A1. *ACS Omega*.  
926 2018;3: 8553–8566. doi:10.1021/acsomega.8b01088
- 927 71. Satou Y, Yasunaga J, Yoshida M, Matsuoka M. HTLV-I basic leucine zipper factor gene  
928 mRNA supports proliferation of adult T cell leukemia cells. *Proc Natl Acad Sci U S A*.  
929 2006;103: 720–725. doi:10.1073/pnas.0507631103
- 930 72. Harhaj EW, Giam C-Z. NF- $\kappa$ B signaling mechanisms in HTLV-1-induced adult T-cell  
931 leukemia/lymphoma. *FEBS J*. 2018;285: 3324–3336. doi:10.1111/febs.14492
- 932 73. Mori N, Fujii M, Ikeda S, Yamada Y, Tomonaga M, Ballard DW, et al. Constitutive  
933 Activation of NF- $\kappa$ B in Primary Adult T-Cell Leukemia Cells. *Blood*. 1999;93: 2360–2368.  
934 doi:10.1182/blood.V93.7.2360
- 935 74. Sun SC, Elwood J, Béraud C, Greene WC. Human T-cell leukemia virus type I Tax  
936 activation of NF-kappa B/Rel involves phosphorylation and degradation of I kappa B  
937 alpha and RelA (p65)-mediated induction of the c-rel gene. *Mol Cell Biol*. 1994 [cited 13  
938 Jan 2022]. doi:10.1128/mcb.14.11.7377-7384.1994
- 939 75. Huang Y, Ohtani K, Iwanaga R, Matsumura Y, Nakamura M. Direct trans-activation of  
940 the human cyclin D2 gene by the oncogene product Tax of human T-cell leukemia virus  
941 type I. *Oncogene*. 2001;20: 1094–1102. doi:10.1038/sj.onc.1204198
- 942 76. Iwanaga R, Ohtani K, Hayashi T, Nakamura M. Molecular mechanism of cell cycle  
943 progression induced by the oncogene product Tax of human T-cell leukemia virus type  
944 I. *Oncogene*. 2001;20: 2055–2067. doi:10.1038/sj.onc.1204304
- 945 77. Lemasson I, Thébault S, Sardet C, Devaux C, Mesnard J-M. Activation of E2F-mediated  
946 Transcription by Human T-cell Leukemia Virus Type I Tax Protein in a p16INK4A-  
947 negative T-cell Line\*. *J Biol Chem*. 1998;273: 23598–23604.  
948 doi:10.1074/jbc.273.36.23598
- 949 78. Mori N, Fujii M, Hinz M, Nakayama K, Yamada Y, Ikeda S, et al. Activation of cyclin D1  
950 and D2 promoters by human T-cell leukemia virus type I tax protein is associated with  
951 IL-2-independent growth of T cells. *Int J Cancer*. 2002;99: 378–385.  
952 doi:10.1002/ijc.10388
- 953 79. Ohtani K, Iwanaga R, Arai M, Huang Y, Matsumura Y, Nakamura M. Cell Type-specific  
954 E2F Activation and Cell Cycle Progression Induced by the Oncogene Product Tax of  
955 Human T-cell Leukemia Virus Type I\*. *J Biol Chem*. 2000;275: 11154–11163.  
956 doi:10.1074/jbc.275.15.11154
- 957 80. Santiago F, Clark E, Chong S, Molina C, Mozafari F, Mahieux R, et al. Transcriptional  
958 Up-Regulation of the Cyclin D2 Gene and Acquisition of New Cyclin-Dependent Kinase  
959 Partners in Human T-Cell Leukemia Virus Type 1-Infected Cells. *J Virol*. 1999;73: 9917–  
960 9927.
- 961 81. Mulloy JC, Kislyakova T, Cereseto A, Casareto L, LoMonico A, Fullen J, et al. Human T-

- 962 Cell Lymphotropic/Leukemia Virus Type 1 Tax Abrogates p53-Induced Cell Cycle Arrest  
963 and Apoptosis through Its CREB/ATF Functional Domain. *J Virol.* 1998;72: 8852–8860.  
964 doi:10.1128/JVI.72.11.8852-8860.1998
- 965 82. Farcas AM, Blackledge NP, Sudbery I, Long HK, McGouran JF, Rose NR, et al. KDM2B  
966 links the Polycomb Repressive Complex 1 (PRC1) to recognition of CpG islands. Struhl  
967 K, editor. *eLife.* 2012;1: e00205. doi:10.7554/eLife.00205
- 968 83. Rose NR, King HW, Blackledge NP, Fursova NA, Ember KJ, Fischer R, et al. RYBP  
969 stimulates PRC1 to shape chromatin-based communication between Polycomb  
970 repressive complexes. Verrijzer P, editor. *eLife.* 2016;5: e18591.  
971 doi:10.7554/eLife.18591
- 972 84. Hayashibara T, Yamada Y, Mori N, Harasawa H, Sugahara K, Miyanishi T, et al. Possible  
973 involvement of aryl hydrocarbon receptor (AhR) in adult T-cell leukemia (ATL)  
974 leukemogenesis: constitutive activation of AhR in ATL. *Biochem Biophys Res Commun.*  
975 2003;300: 128–134. doi:10.1016/S0006-291X(02)02793-6
- 976 85. Fujisawa J, Toita M, Yoshida M. A unique enhancer element for the trans activator  
977 (p40tax) of human T-cell leukemia virus type I that is distinct from cyclic AMP- and 12-  
978 O-tetradecanoylphorbol-13-acetate-responsive elements. *J Virol.* 1989;63: 3234–3239.  
979 doi:10.1128/JVI.63.8.3234-3239.1989
- 980 86. Zhang L, Liu M, Merling R, Giam C-Z. Versatile reporter systems show that  
981 transactivation by human T-cell leukemia virus type 1 Tax occurs independently of  
982 chromatin remodeling factor BRG1. *J Virol.* 2006;80: 7459–7468.  
983 doi:10.1128/JVI.00130-06
- 984 87. Cikos S, Bukovská A, Koppel J. Relative quantification of mRNA: comparison of methods  
985 currently used for real-time PCR data analysis. *BMC Mol Biol.* 2007;8: 113.  
986 doi:10.1186/1471-2199-8-113
- 987 88. Satou Y, Miyazato P, Ishihara K, Yaguchi H, Melamed A, Miura M, et al. The retrovirus  
988 HTLV-1 inserts an ectopic CTCF-binding site into the human genome. *Proc Natl Acad*  
989 *Sci.* 2016;113: 3054–3059. doi:10.1073/pnas.1423199113
- 990 89. Lin P, Hu S-W, Chang T-H. Correlation between gene expression of aryl hydrocarbon  
991 receptor (AhR), hydrocarbon receptor nuclear translocator (Arnt), cytochromes P4501A1  
992 (CYP1A1) and 1B1 (CYP1B1), and inducibility of CYP1A1 and CYP1B1 in human  
993 lymphocytes. *Toxicol Sci Off J Soc Toxicol.* 2003;71: 20–26. doi:10.1093/toxsci/71.1.20
- 994 90. R Core Team. *R: A Language and Environment for Statistical Computing.* Vienna,  
995 Austria: R Foundation for Statistical Computing; 2021.
- 996 91. Dobin A, Davis CA, Schlesinger F, Drenkow J, Zaleski C, Jha S, et al. STAR: Ultrafast  
997 universal RNA-seq aligner. *Bioinformatics.* 2013;29: 15–21.  
998 doi:10.1093/bioinformatics/bts635

- 999 92. Li B, Dewey CN. RSEM: accurate transcript quantification from RNA-Seq data with or  
1000 without a reference genome. *BMC Bioinformatics*. 2011;12: 323. doi:10.1186/1471-2105-  
1001 12-323
- 1002 93. Sonesson C, Love MI, Robinson MD. Differential analyses for RNA-seq: transcript-level  
1003 estimates improve gene-level inferences. *F1000Research*; 2016.  
1004 doi:10.12688/f1000research.7563.2
- 1005 94. Love MI, Huber W, Anders S. Moderated estimation of fold change and dispersion for  
1006 RNA-seq data with DESeq2. *Genome Biol*. 2014;15: 550. doi:10.1186/s13059-014-0550-  
1007 8
- 1008 95. Benjamini Y, Hochberg Y. Controlling the False Discovery Rate: A Practical and Powerful  
1009 Approach to Multiple Testing. *J R Stat Soc Ser B Methodol*. 1995;57: 289–300.
- 1010 96. Anders S, Huber W. Differential expression analysis for sequence count data. *Genome*  
1011 *Biol*. 2010;11: R106. doi:10.1186/gb-2010-11-10-r106
- 1012 97. Raudvere U, Kolberg L, Kuzmin I, Arak T, Adler P, Peterson H, et al. g:Profiler: a web  
1013 server for functional enrichment analysis and conversions of gene lists (2019 update).  
1014 *Nucleic Acids Res*. 2019;47: W191–W198. doi:10.1093/nar/gkz369



## 1015 **Supporting information captions**

1016 **S1 Fig. Schematic of provirus in 3.60.** Schematic of the provirus in clone 3.60 with the 202 bp deletion  
1017 and coding-regions of Env, Tax and sHBZ marked.

1018 **S2 Fig. Volcano plots of genes deregulated between early burst and silent and late burst**  
1019 **phases.** Significantly up-regulated genes are in yellow and down-regulated genes in blue. HTLV-1 plus, Timer  
1020 and top 10 most significantly up- and down-regulated genes are labelled; ns - not significant.

1021 **S3 Fig. Gene trajectories of genes mentioned in main text.** Y-axis: normalized counts on log<sub>10</sub>-  
1022 scale. Significance is determined with LRT. FDR-corrected p-value < 0.01.

1023 **S4 Fig. NF- $\kappa$ B pathway is significantly up-regulated in each clone.** (A) K-means clustering of  
1024 10048 significantly DE genes with k=2 in clone 3.60 and 4798 DE genes in clone TBX4B. The top 10 genes based  
1025 on mean rank of sorted p-values are listed on the right in each panel. The mean expression trajectory is coloured  
1026 yellow or blue.

1027 Significance is determined with LRT. FDR-corrected p-value < 0.01. (B) Over-representation analysis of K-means  
1028 clusters with the Hallmarks gene set from The Molecular Signatures Database (MSigDB). Statistical significance  
1029 was determined by Fisher's exact test in g:Profiler. FDR-corrected p-value < 0.05.

1030 **S1 Data.** Differential expression results for clone 3.60.

1031 **S2 Data.** Differential expression results for clone TBX4B.

1032 **S3 Data.** AhR measurements

A

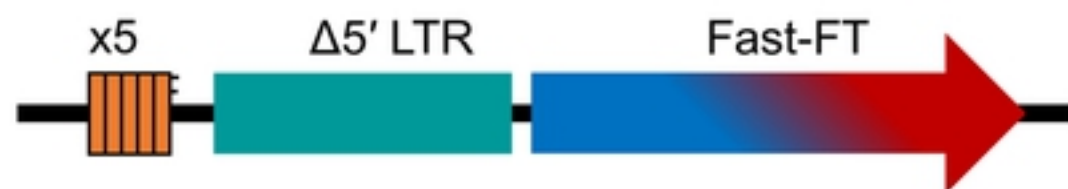

B

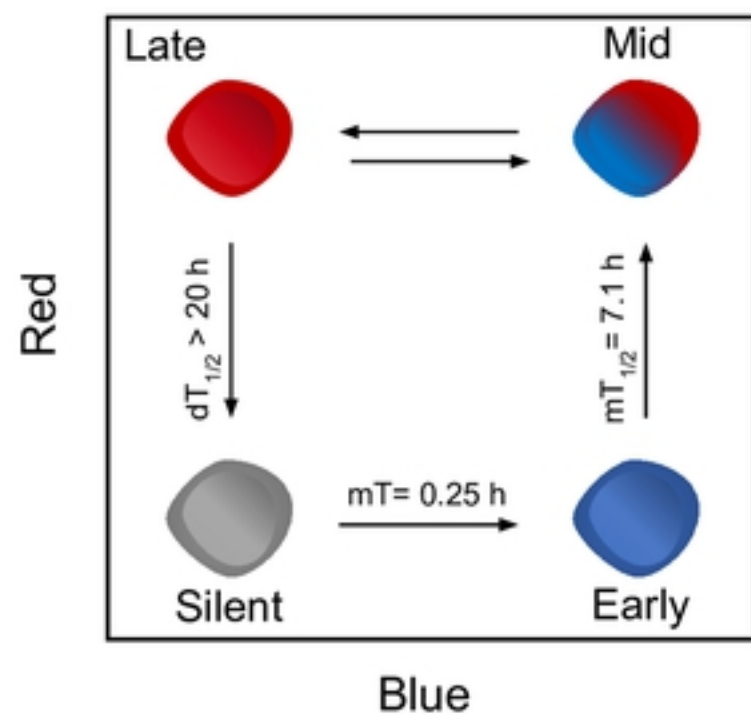

C

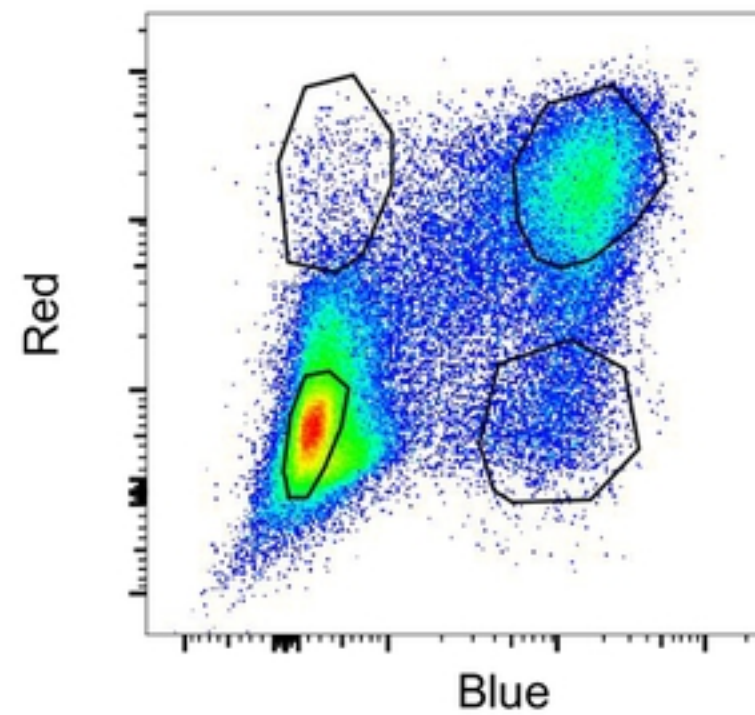

D

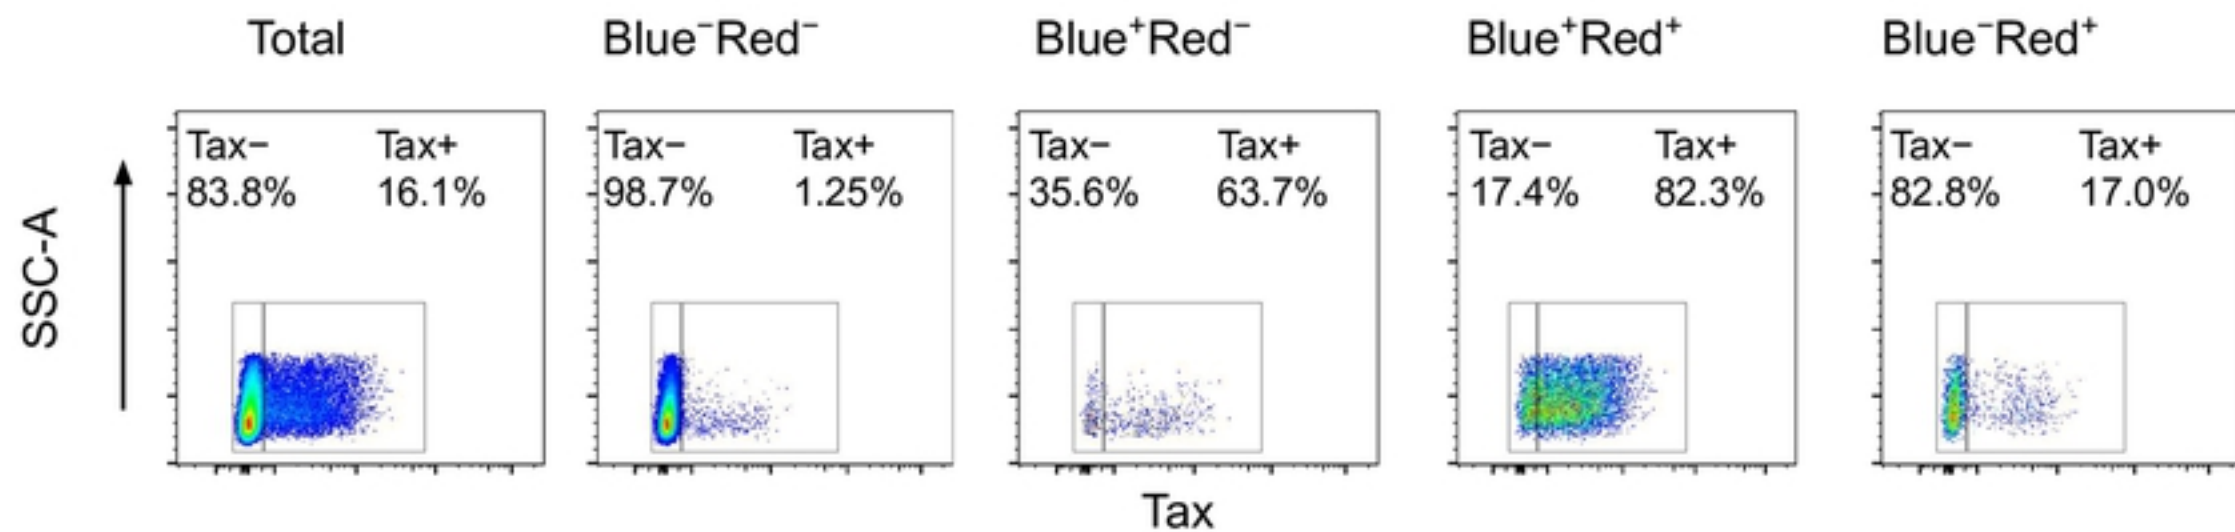

Figure 1

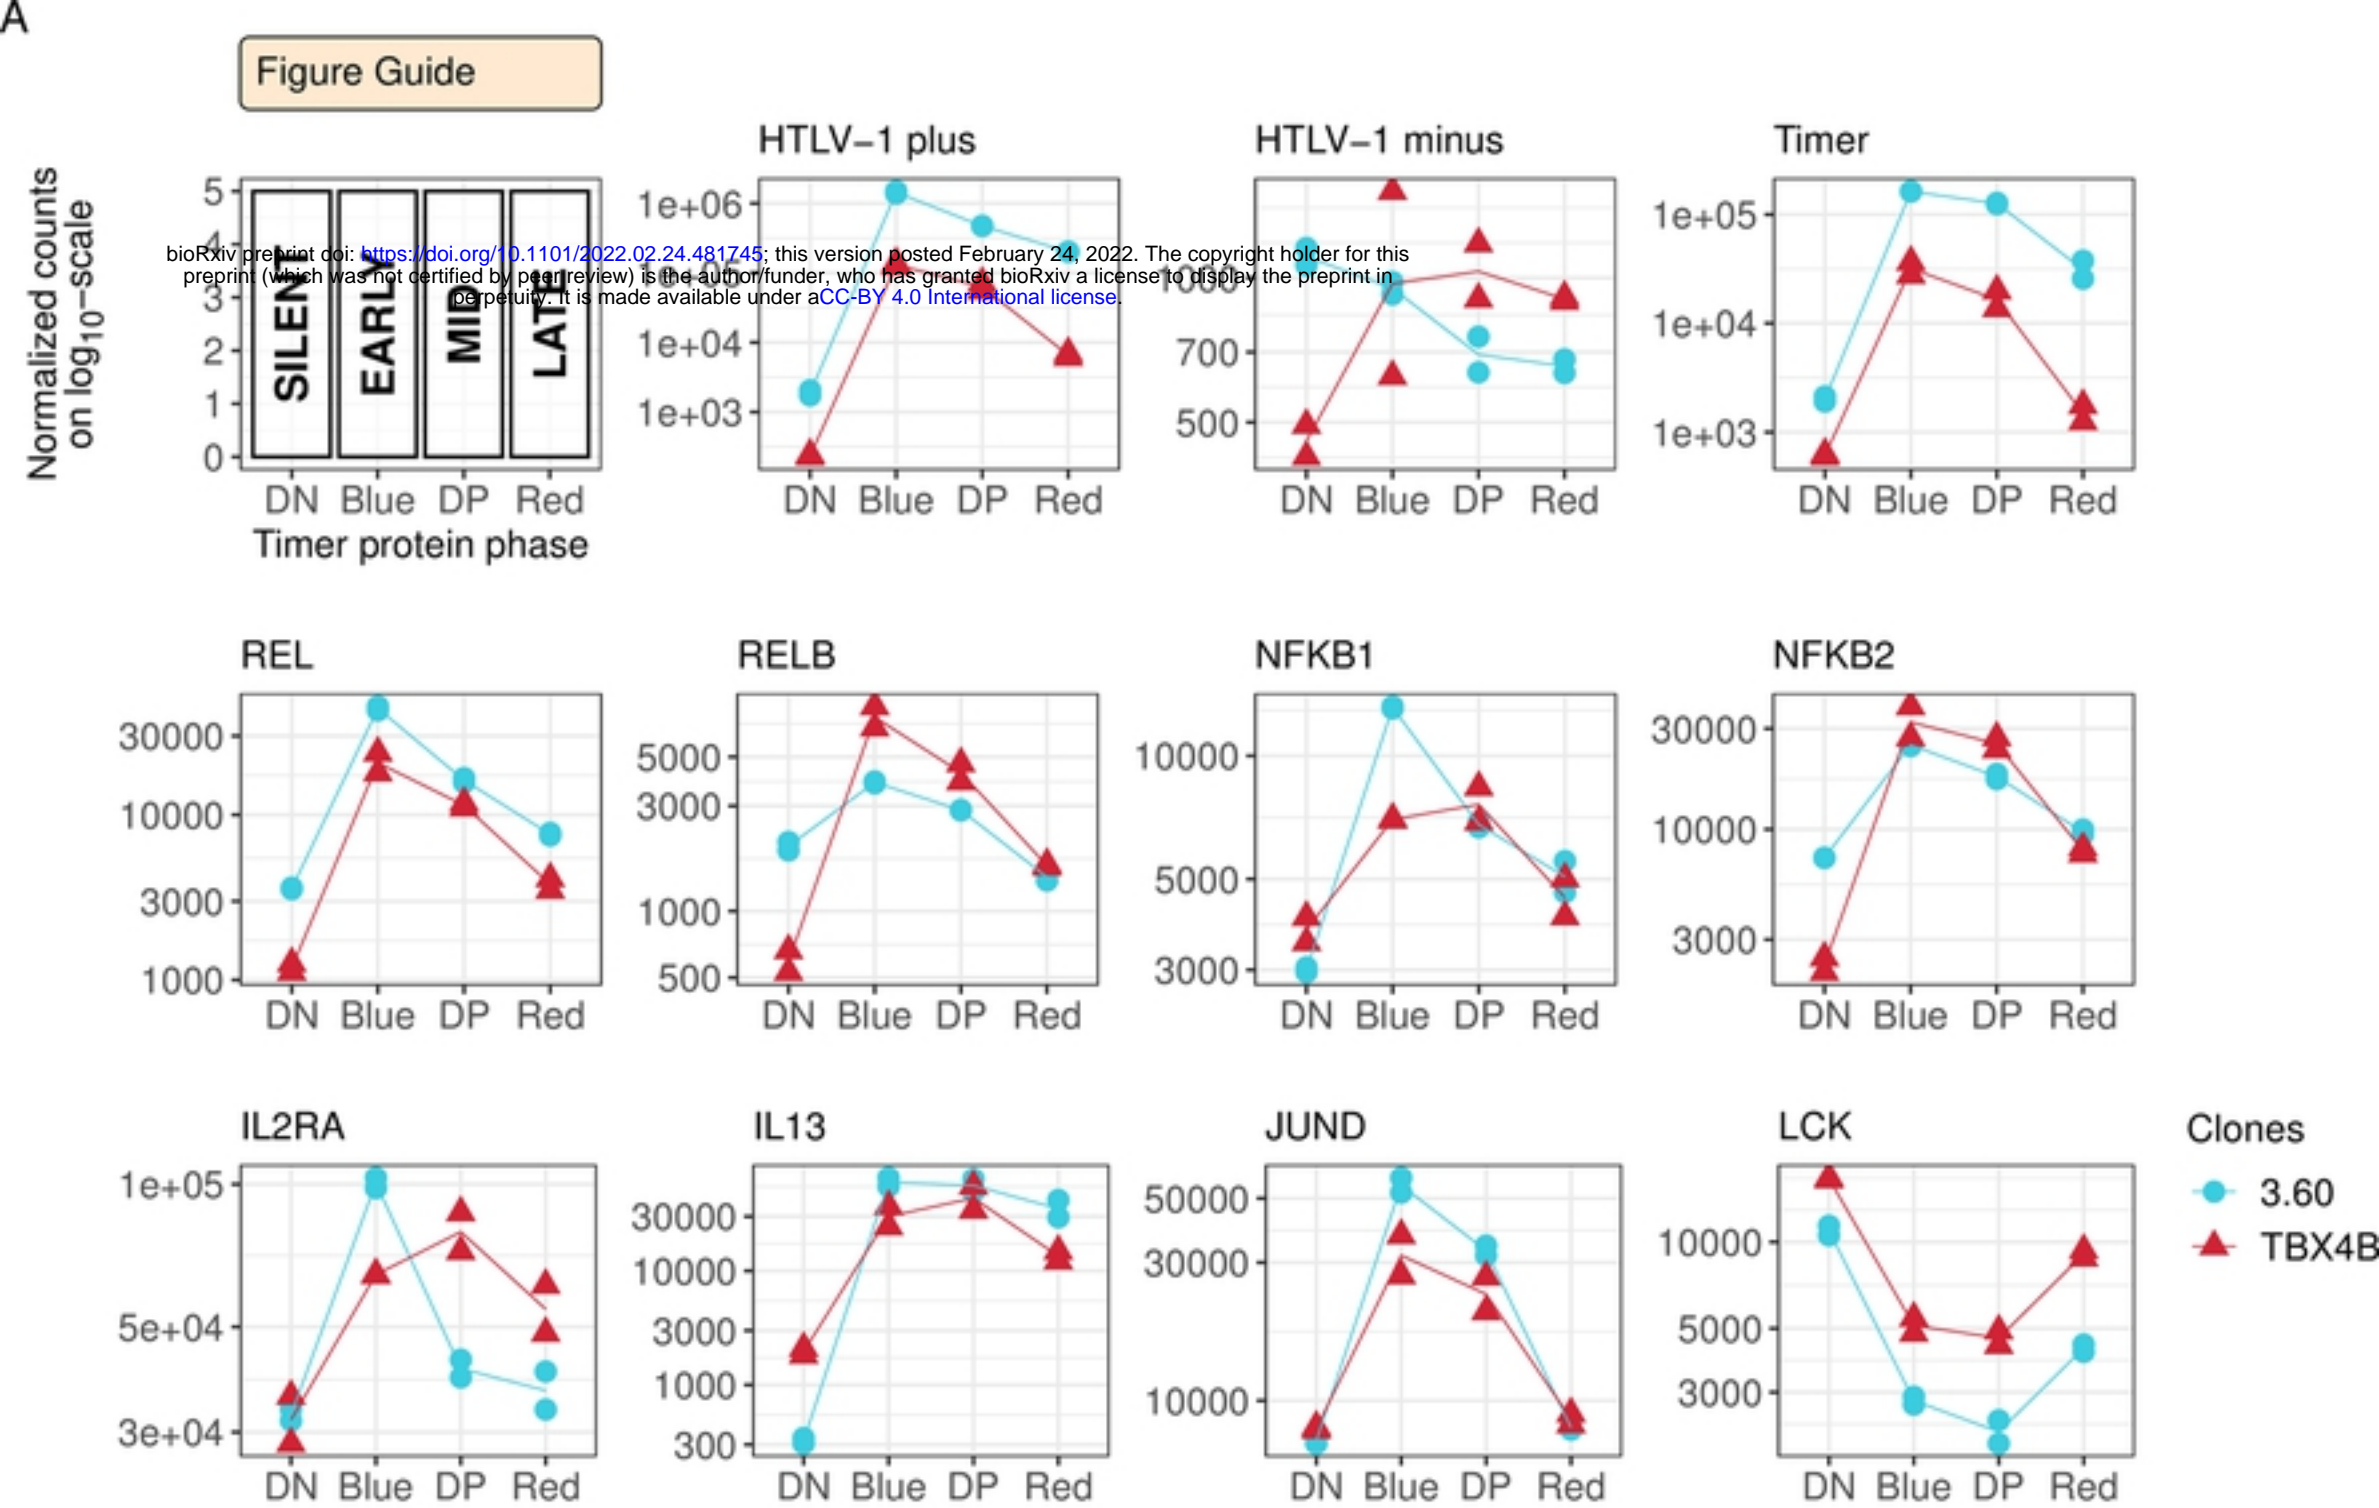

**B**

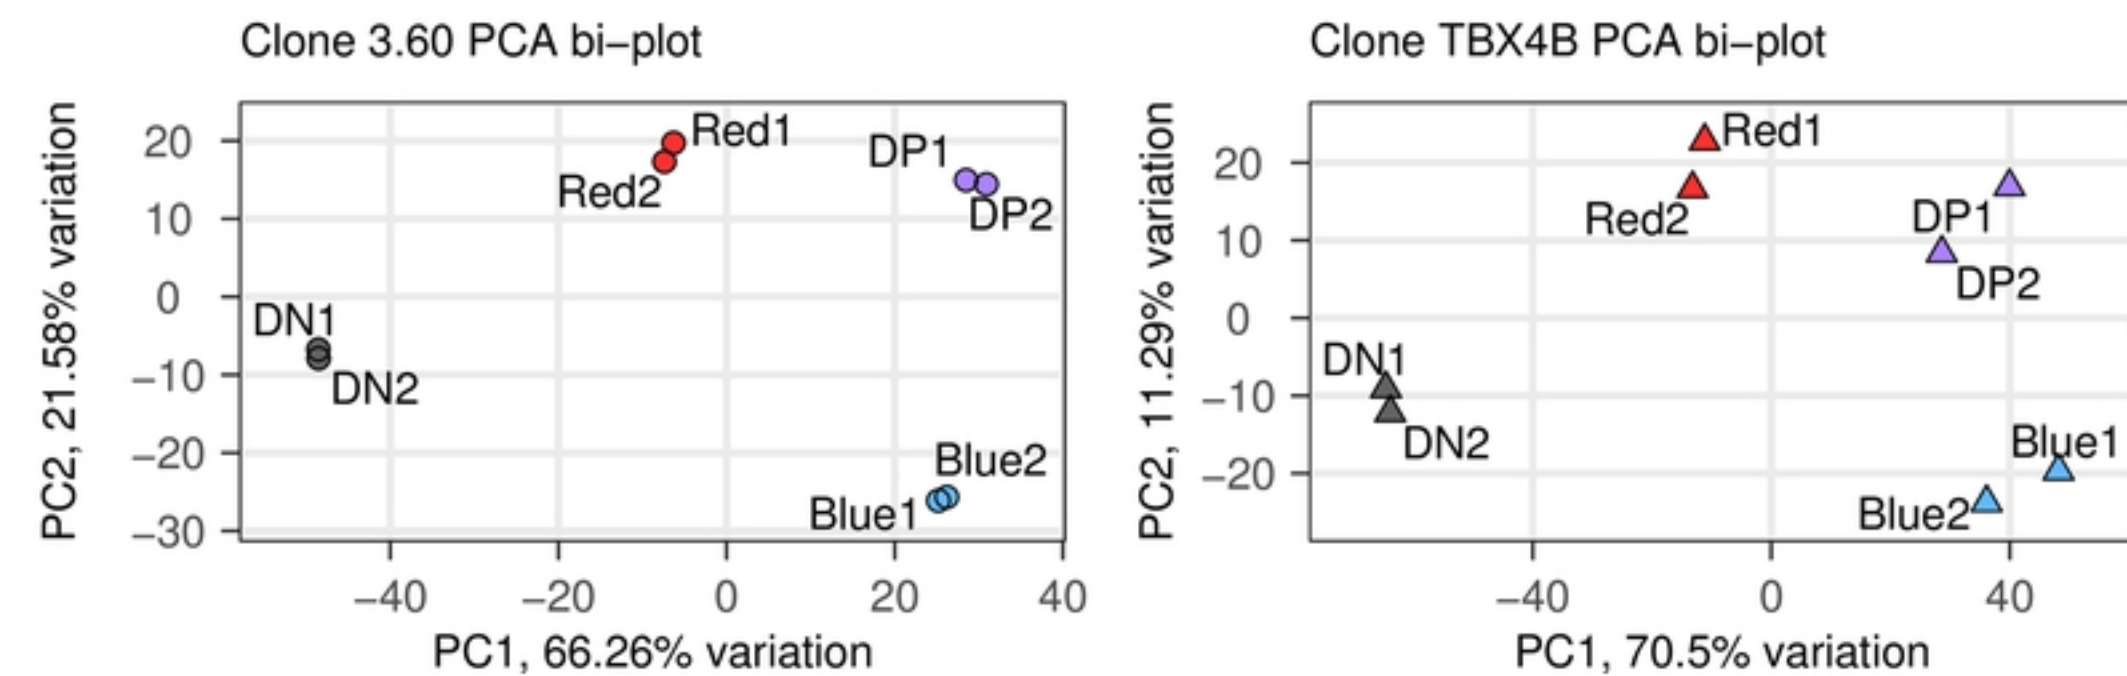

**Figure 2**



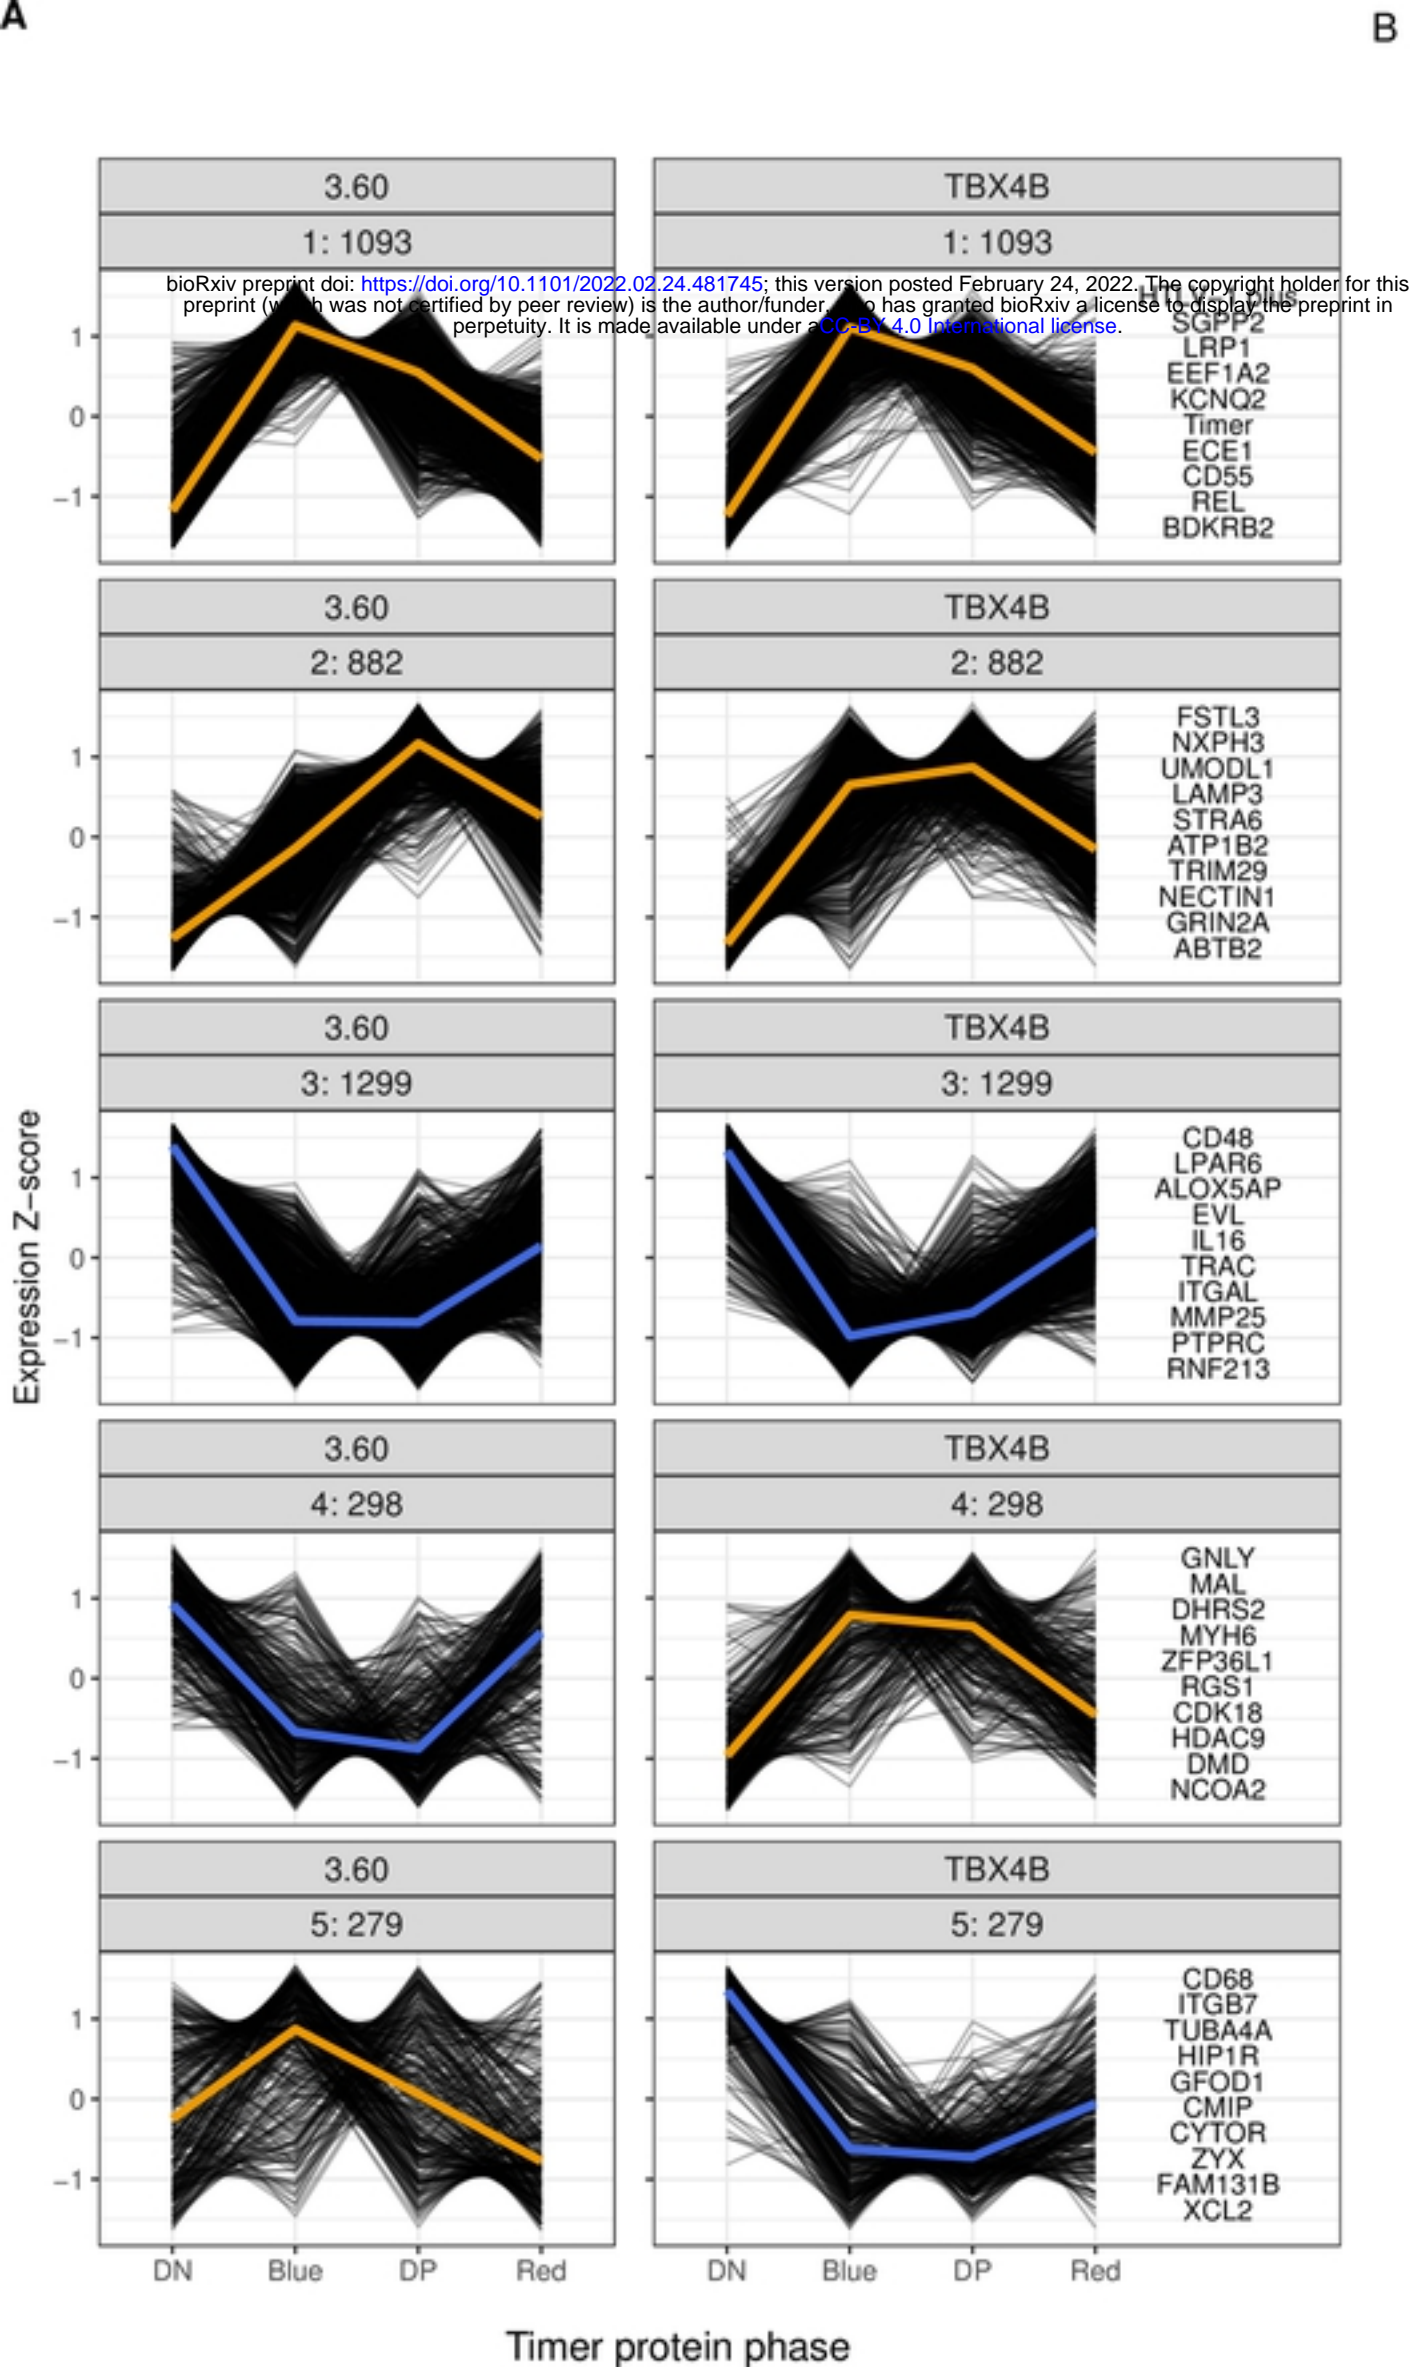

**B**

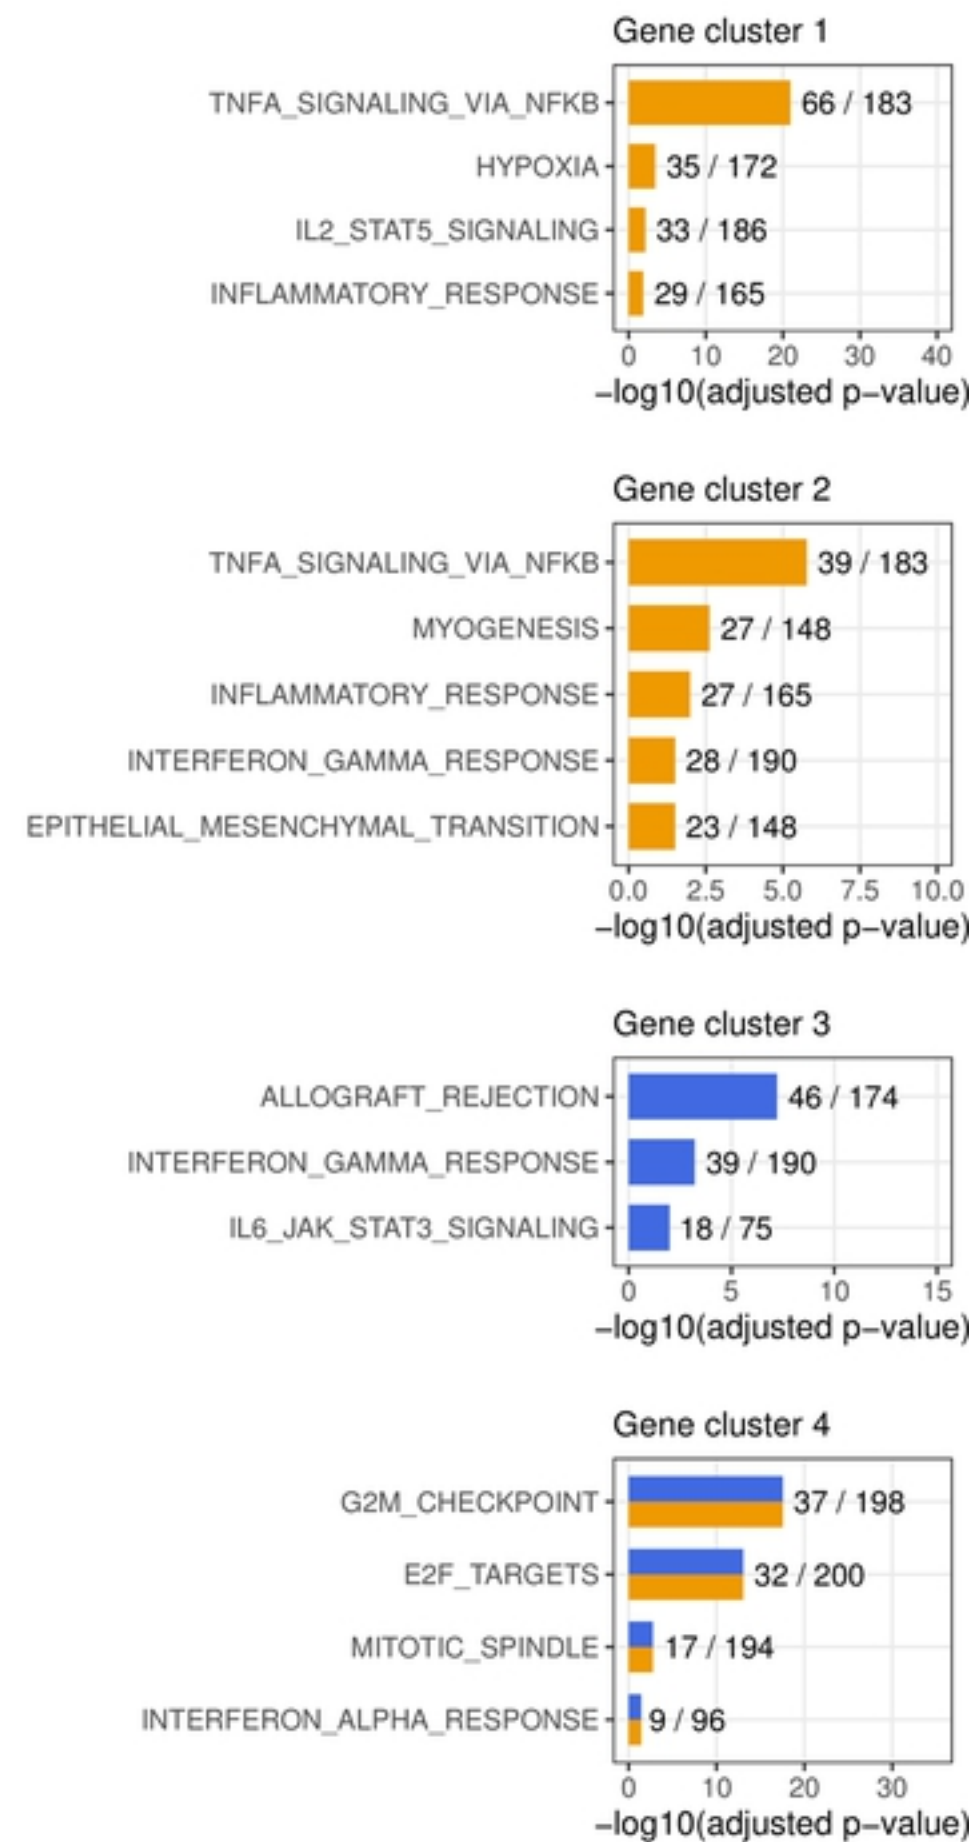

Figure 3

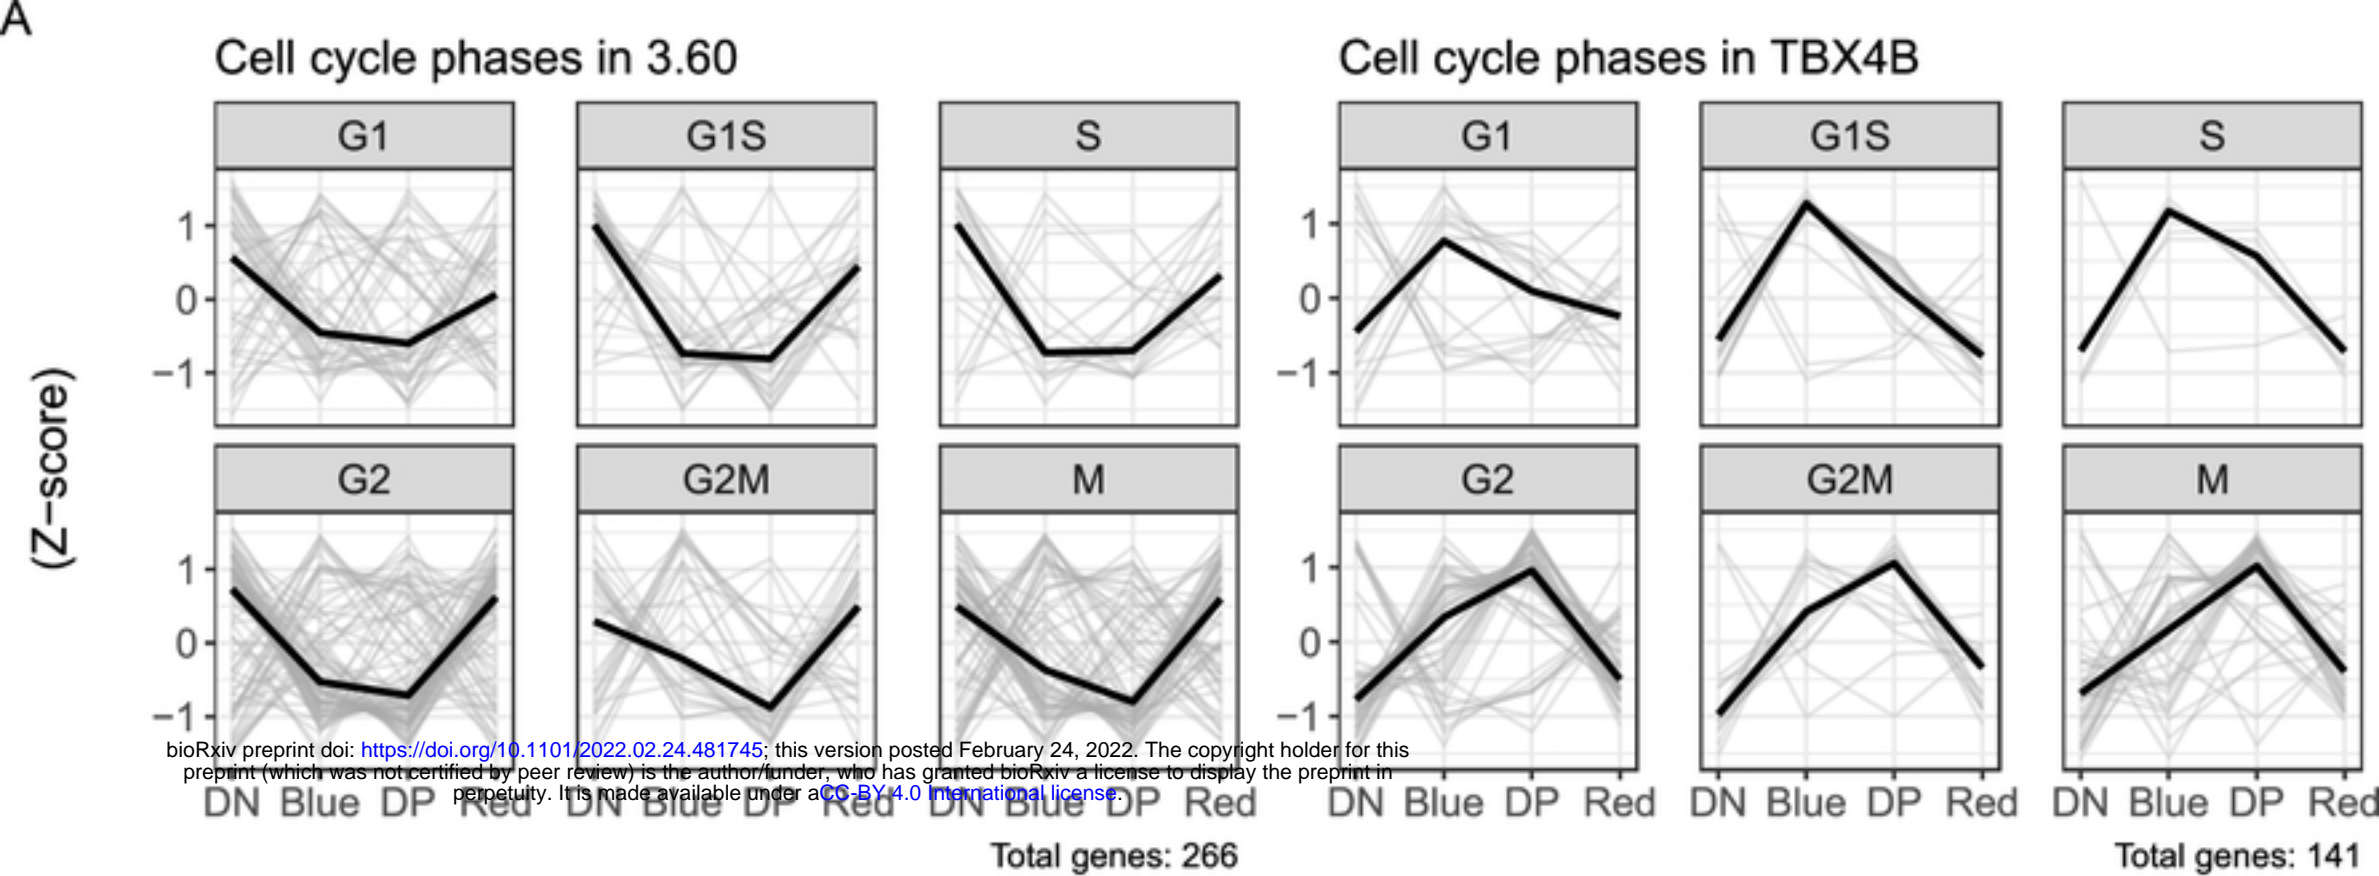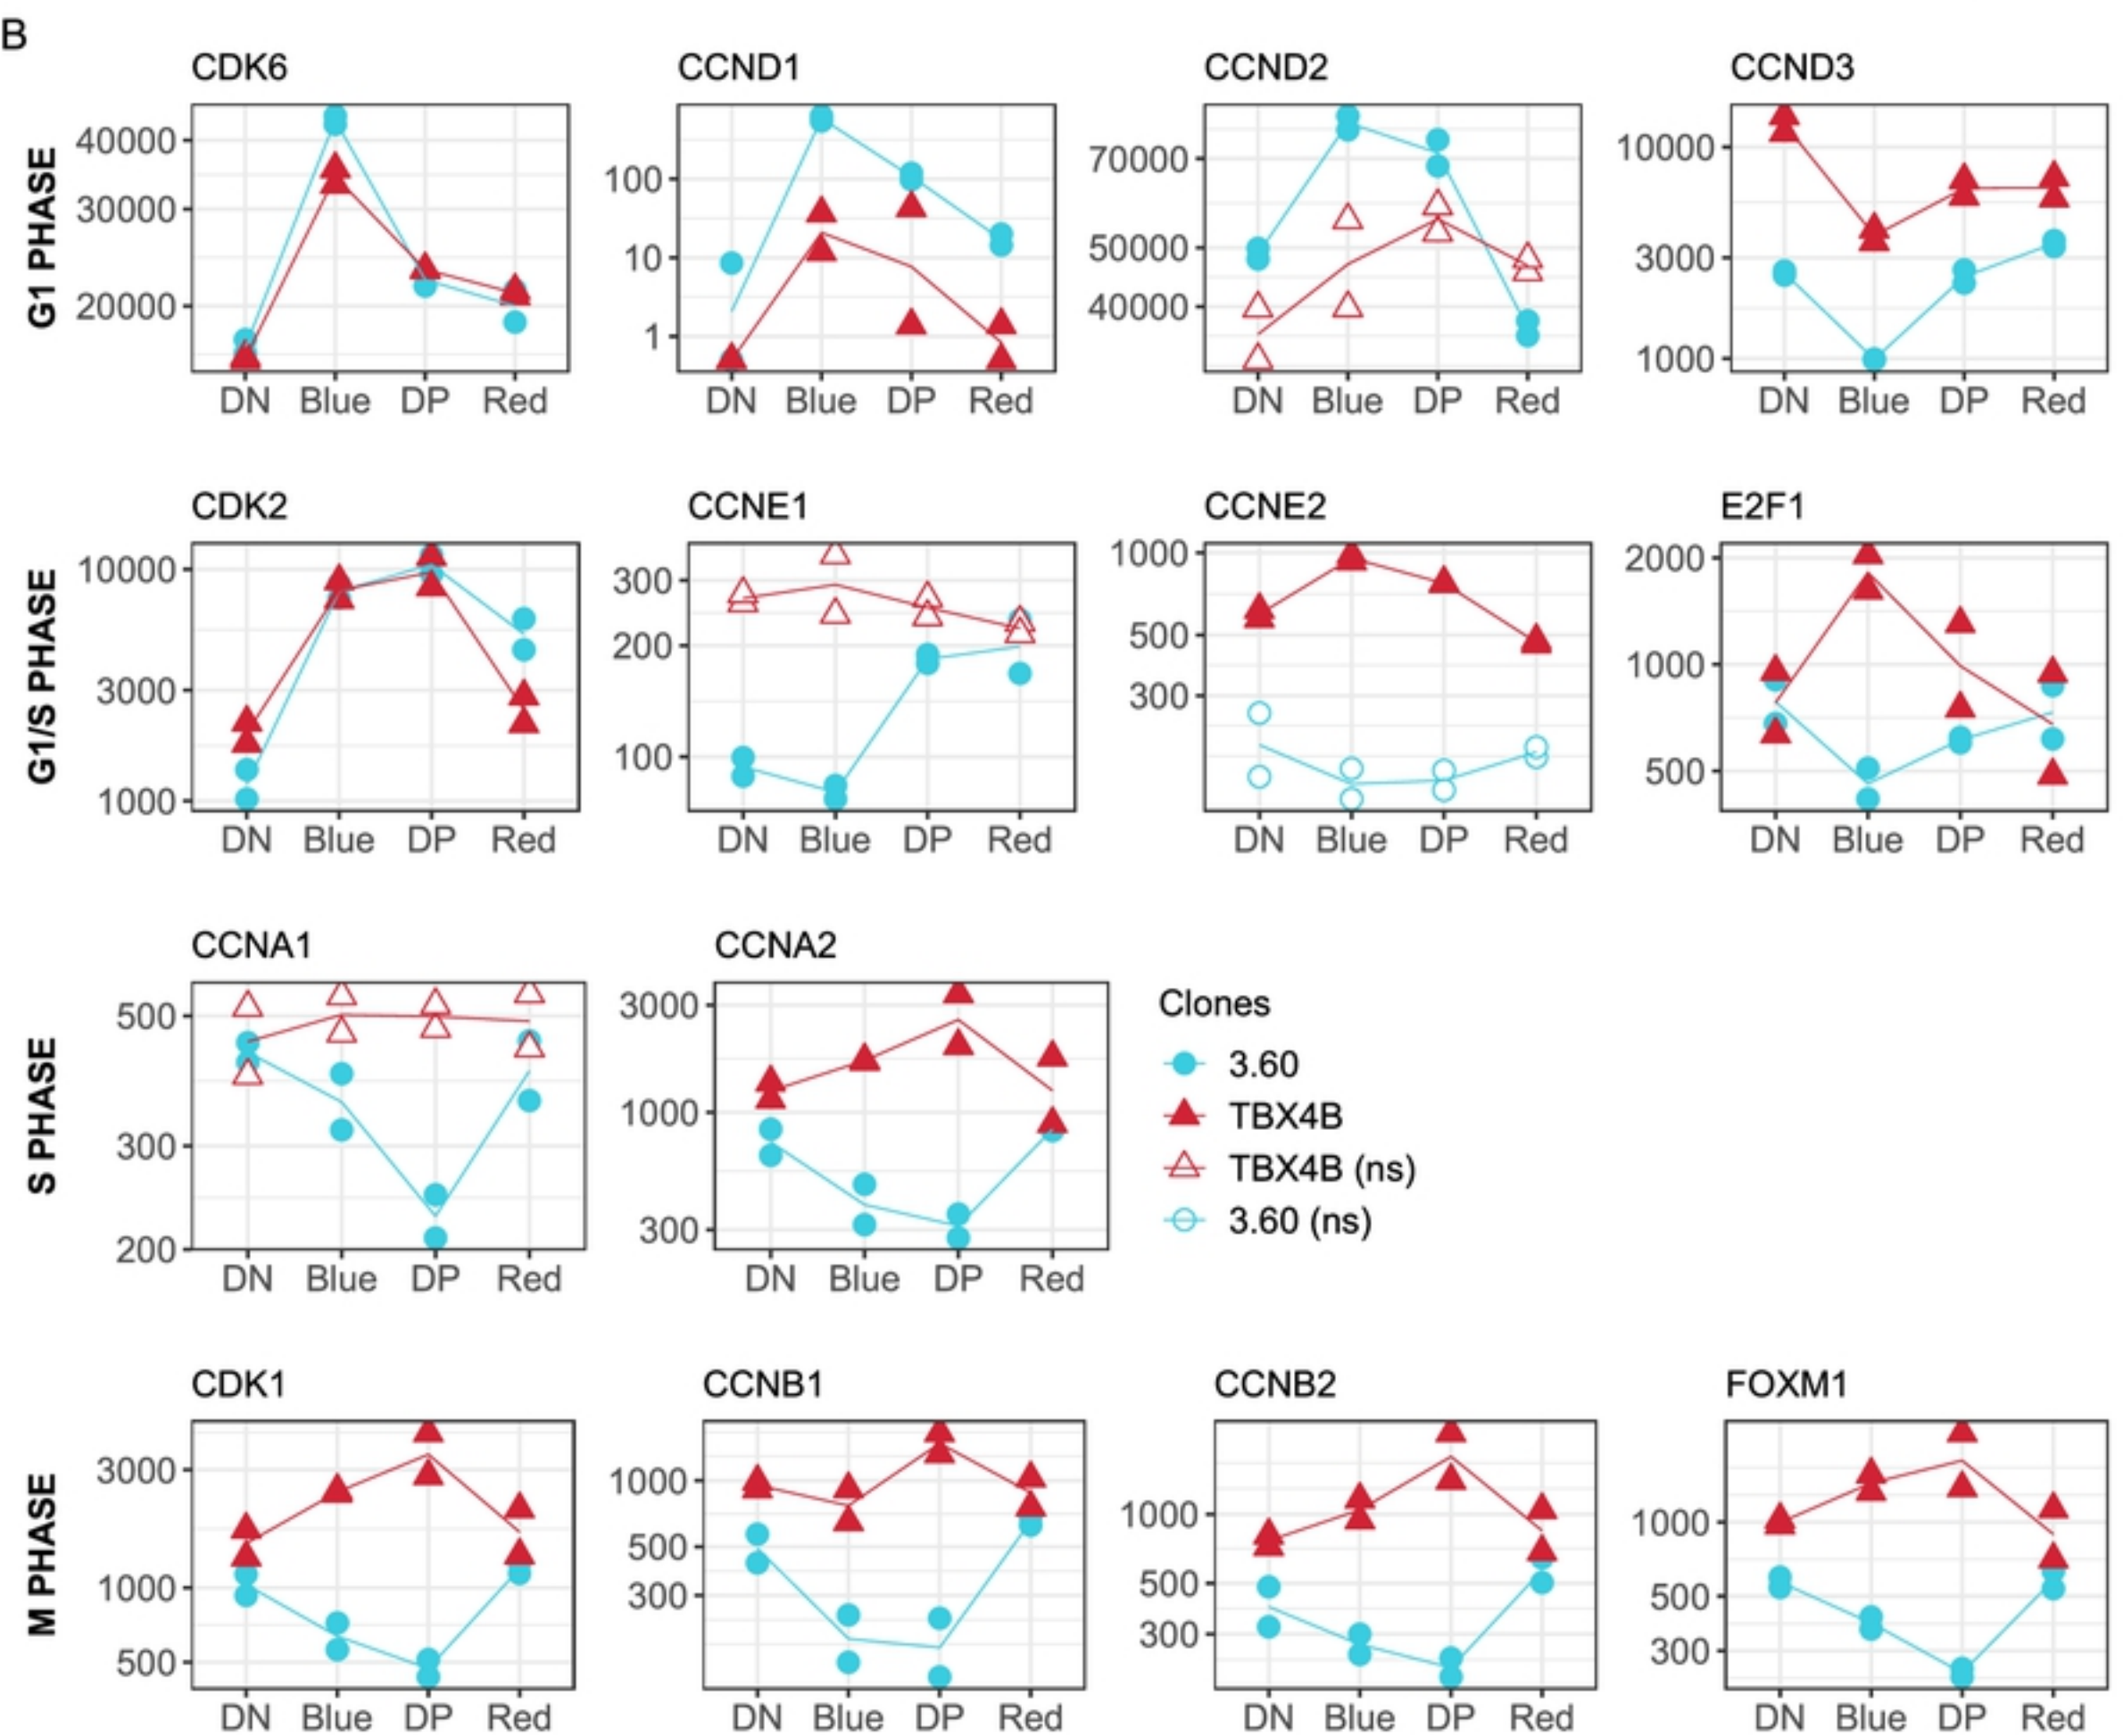

Figure 4



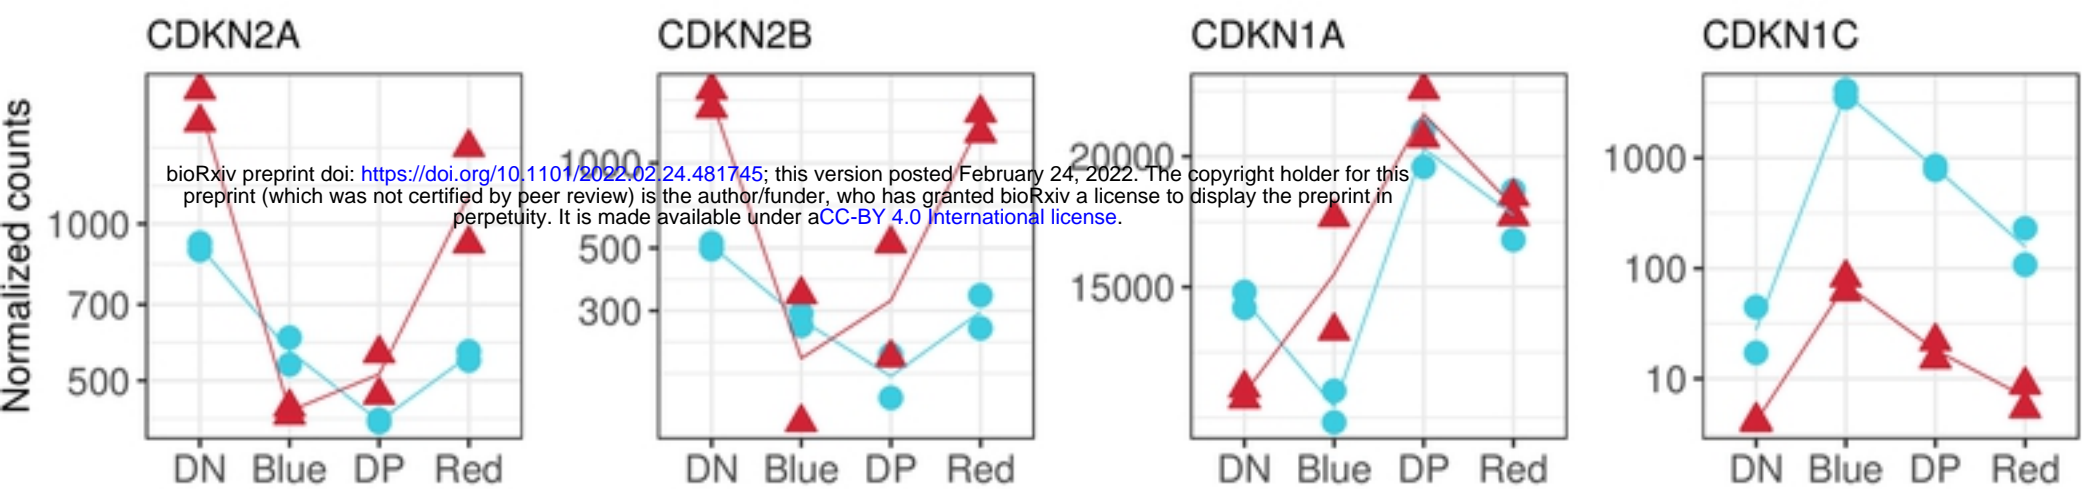

DDR and senescence

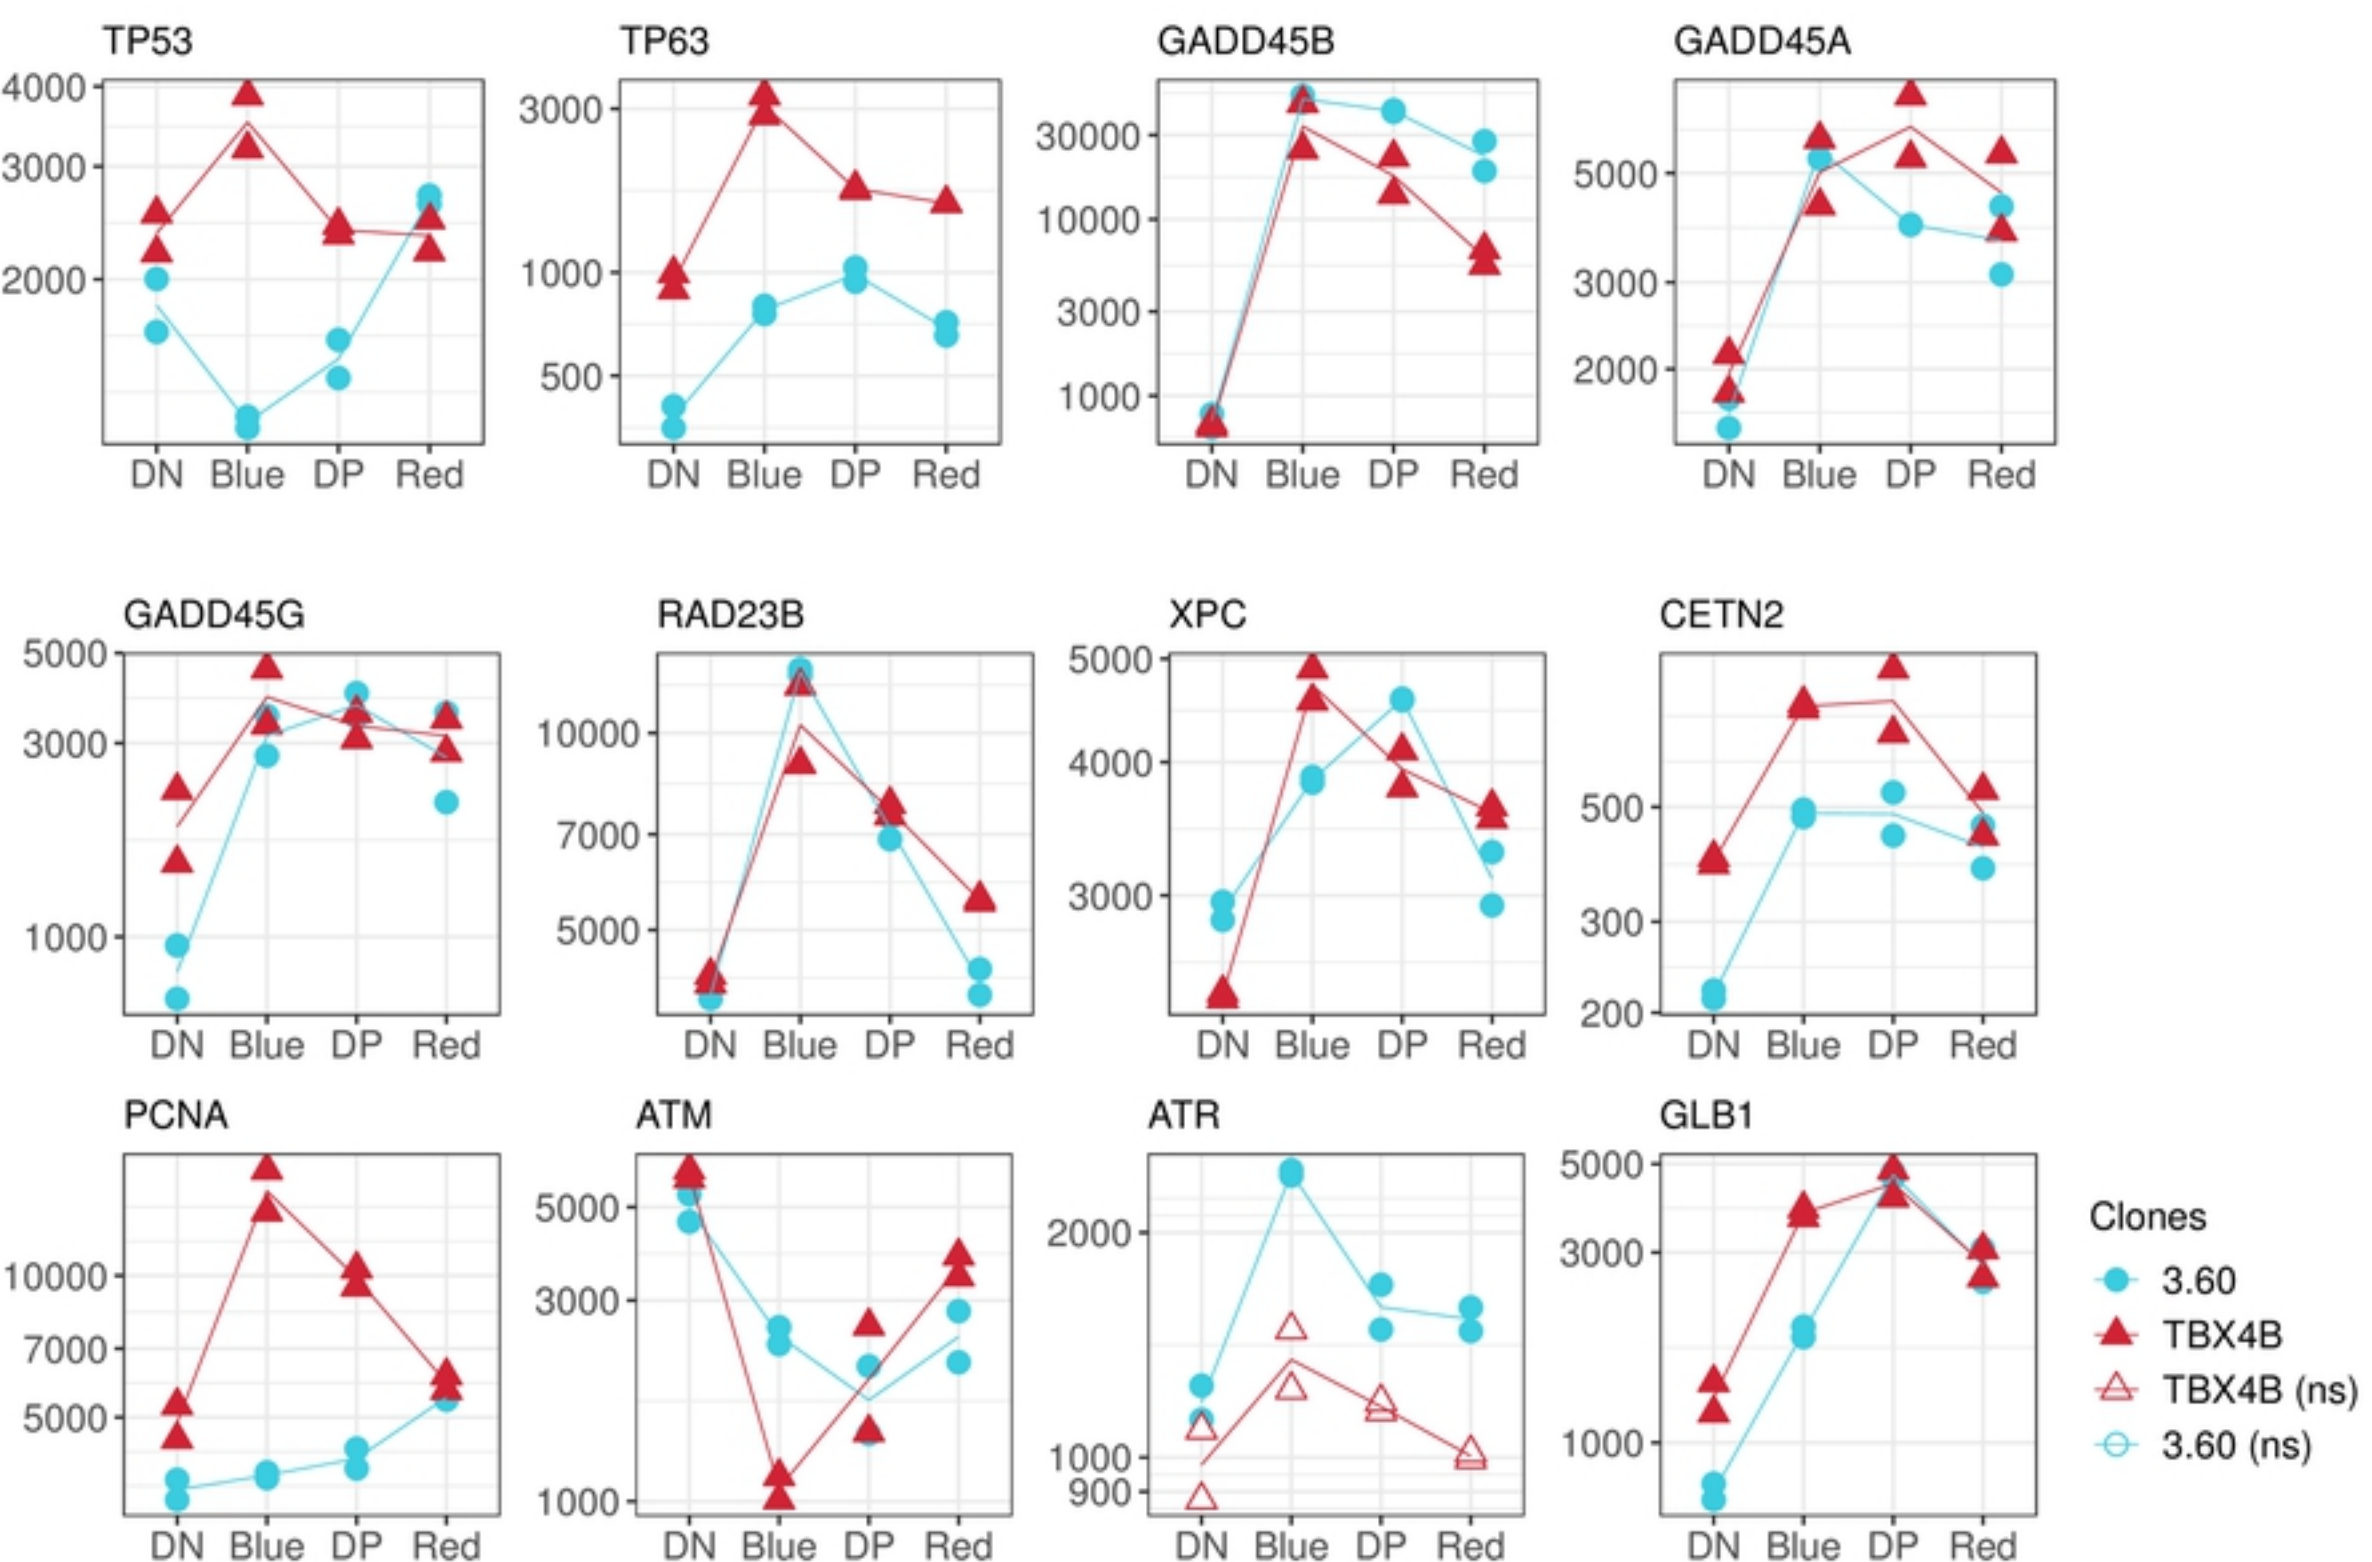

Figure 5

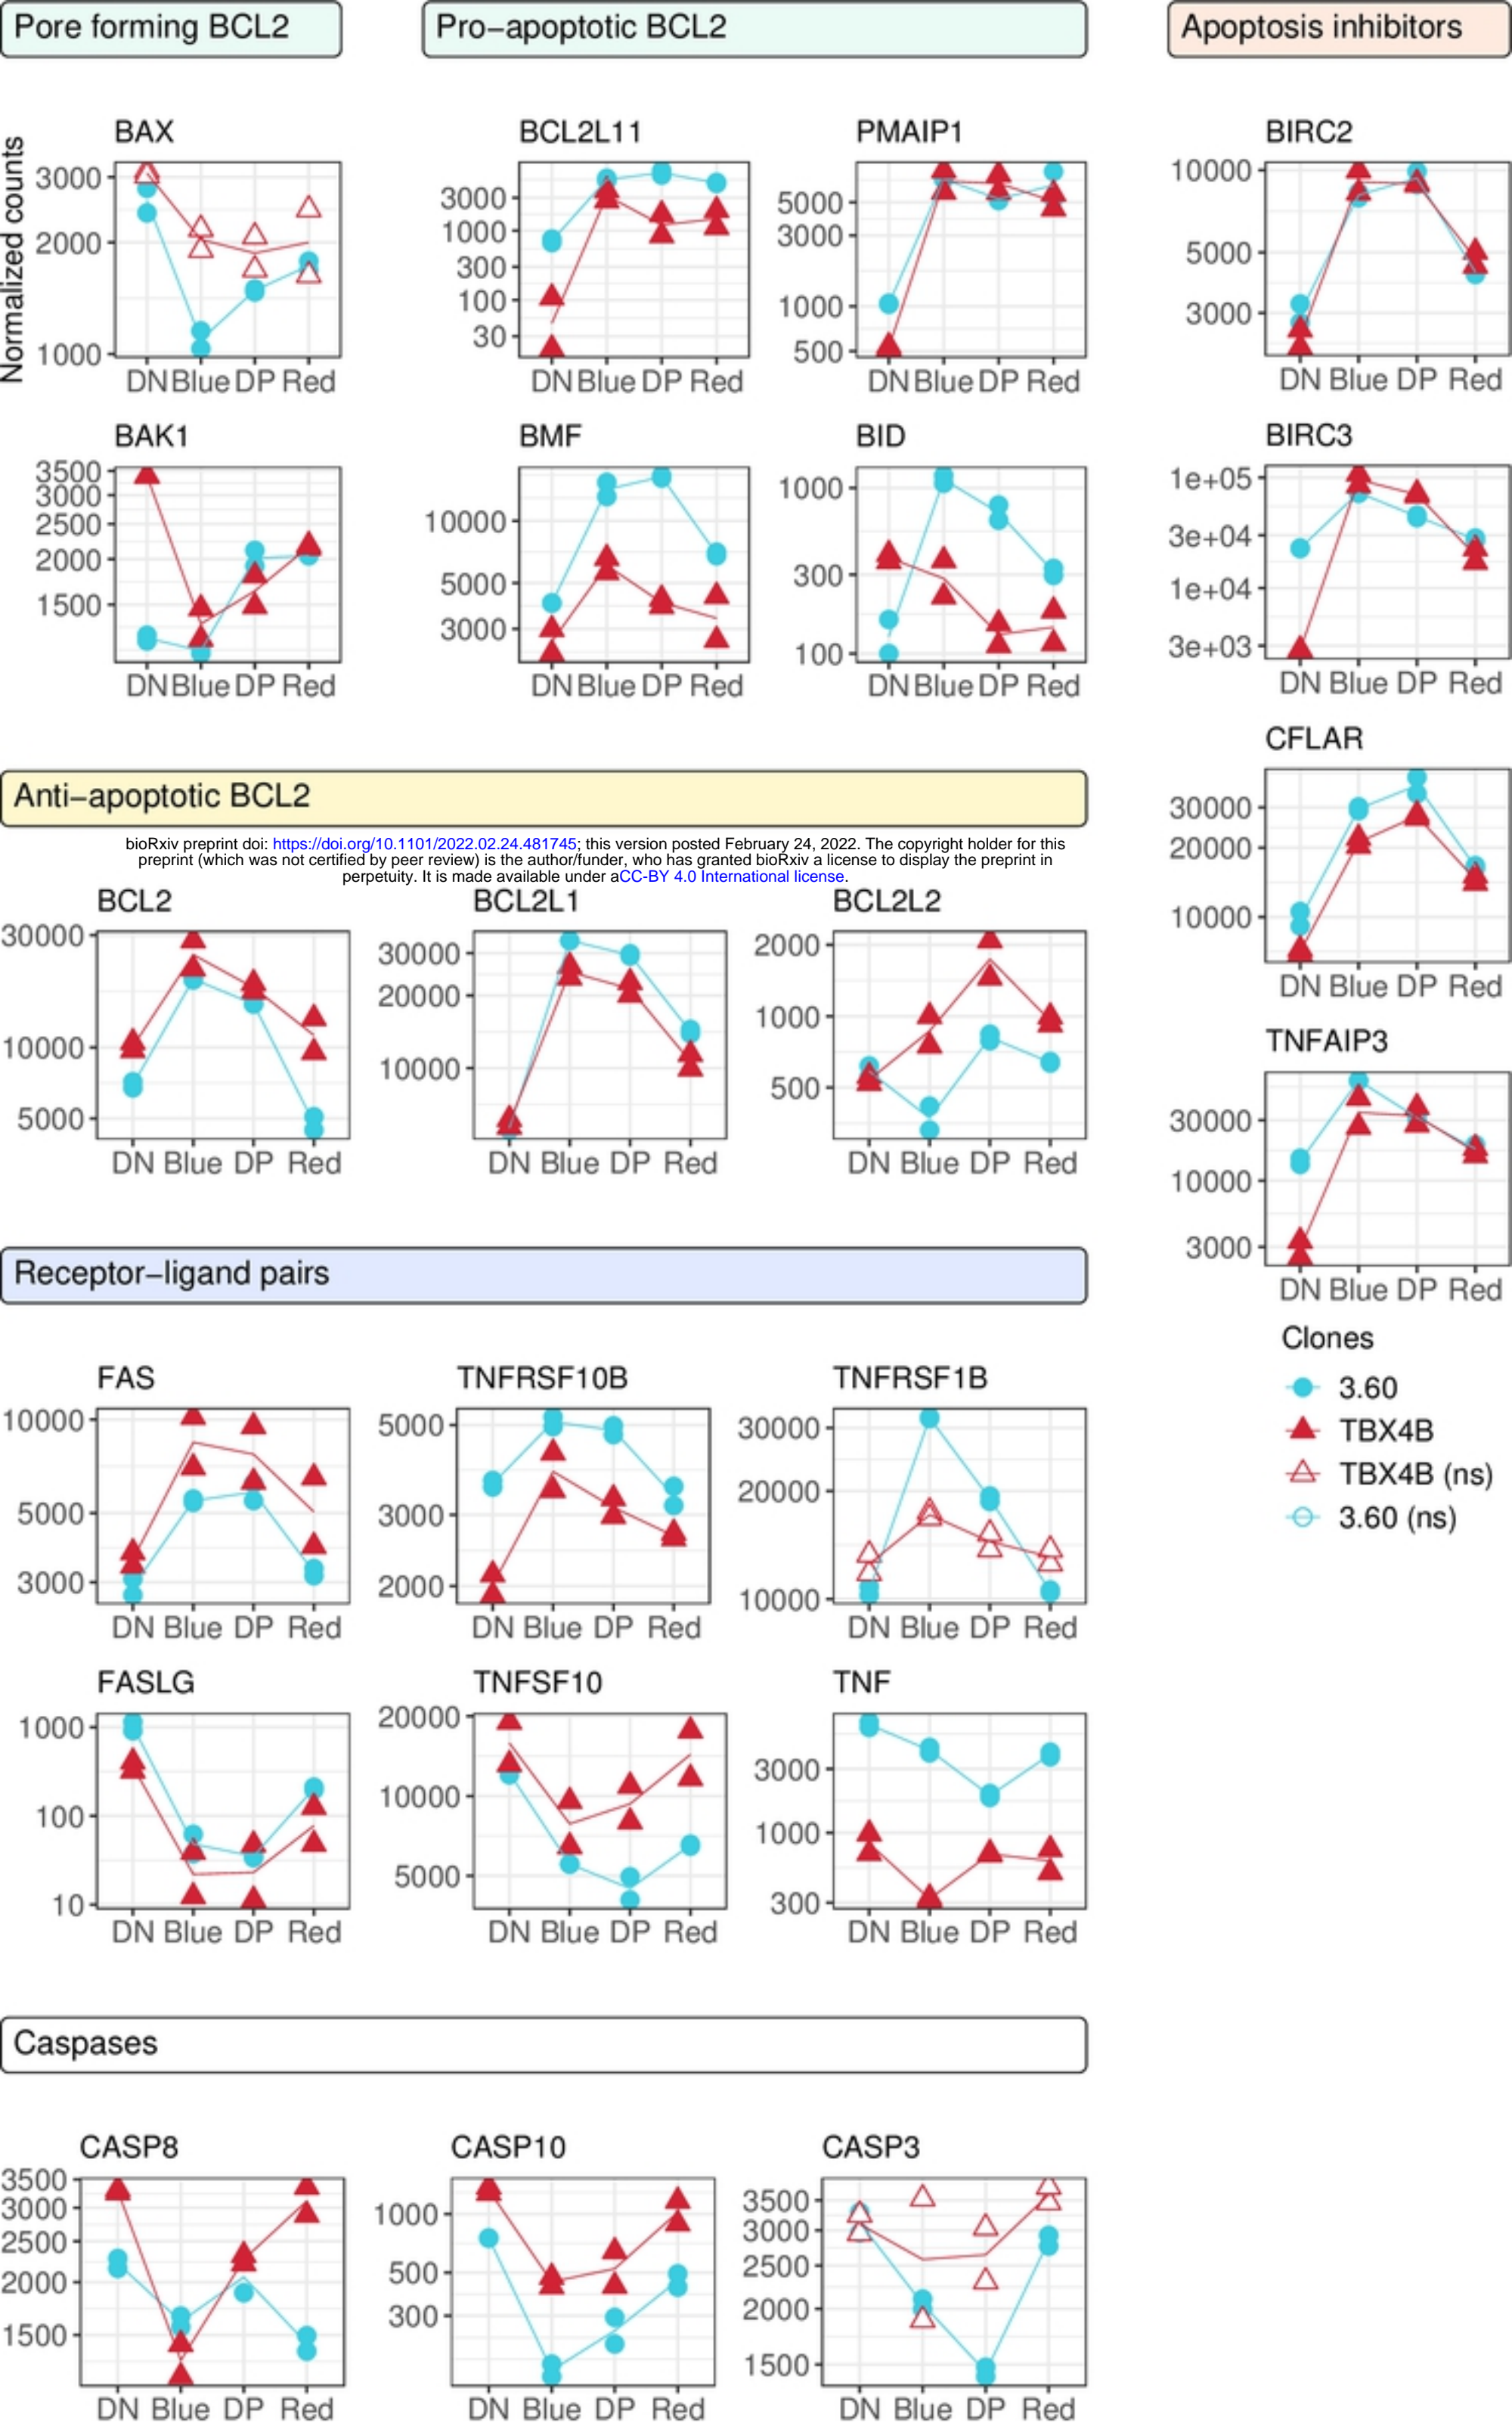

Figure 6

Non-canonical PRC1

Canonical PRC1

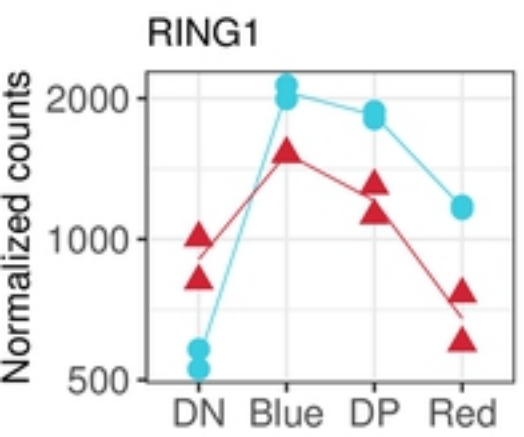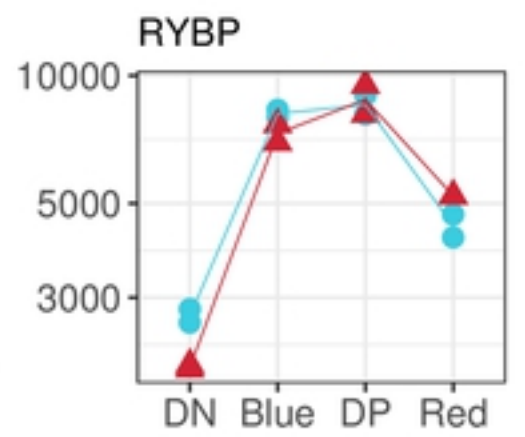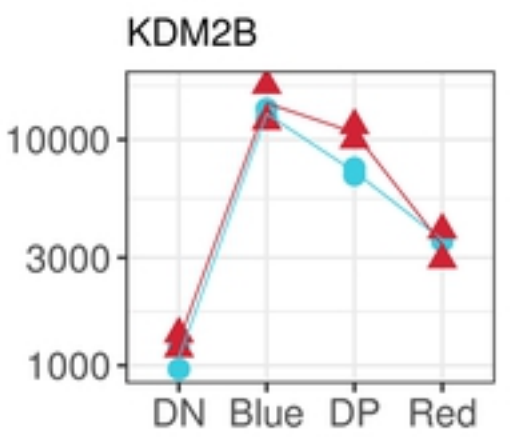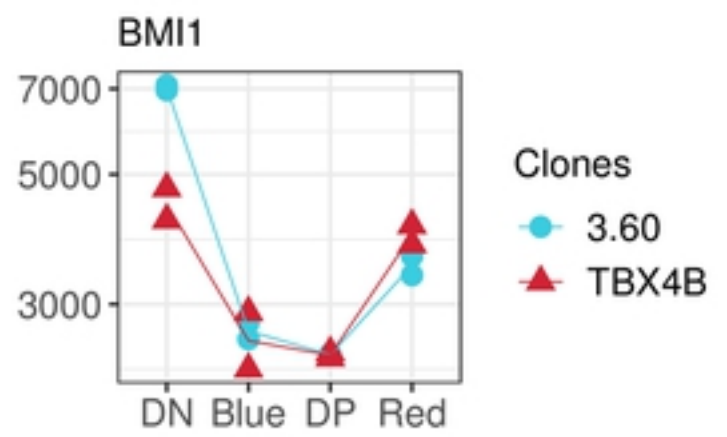

Figure 7



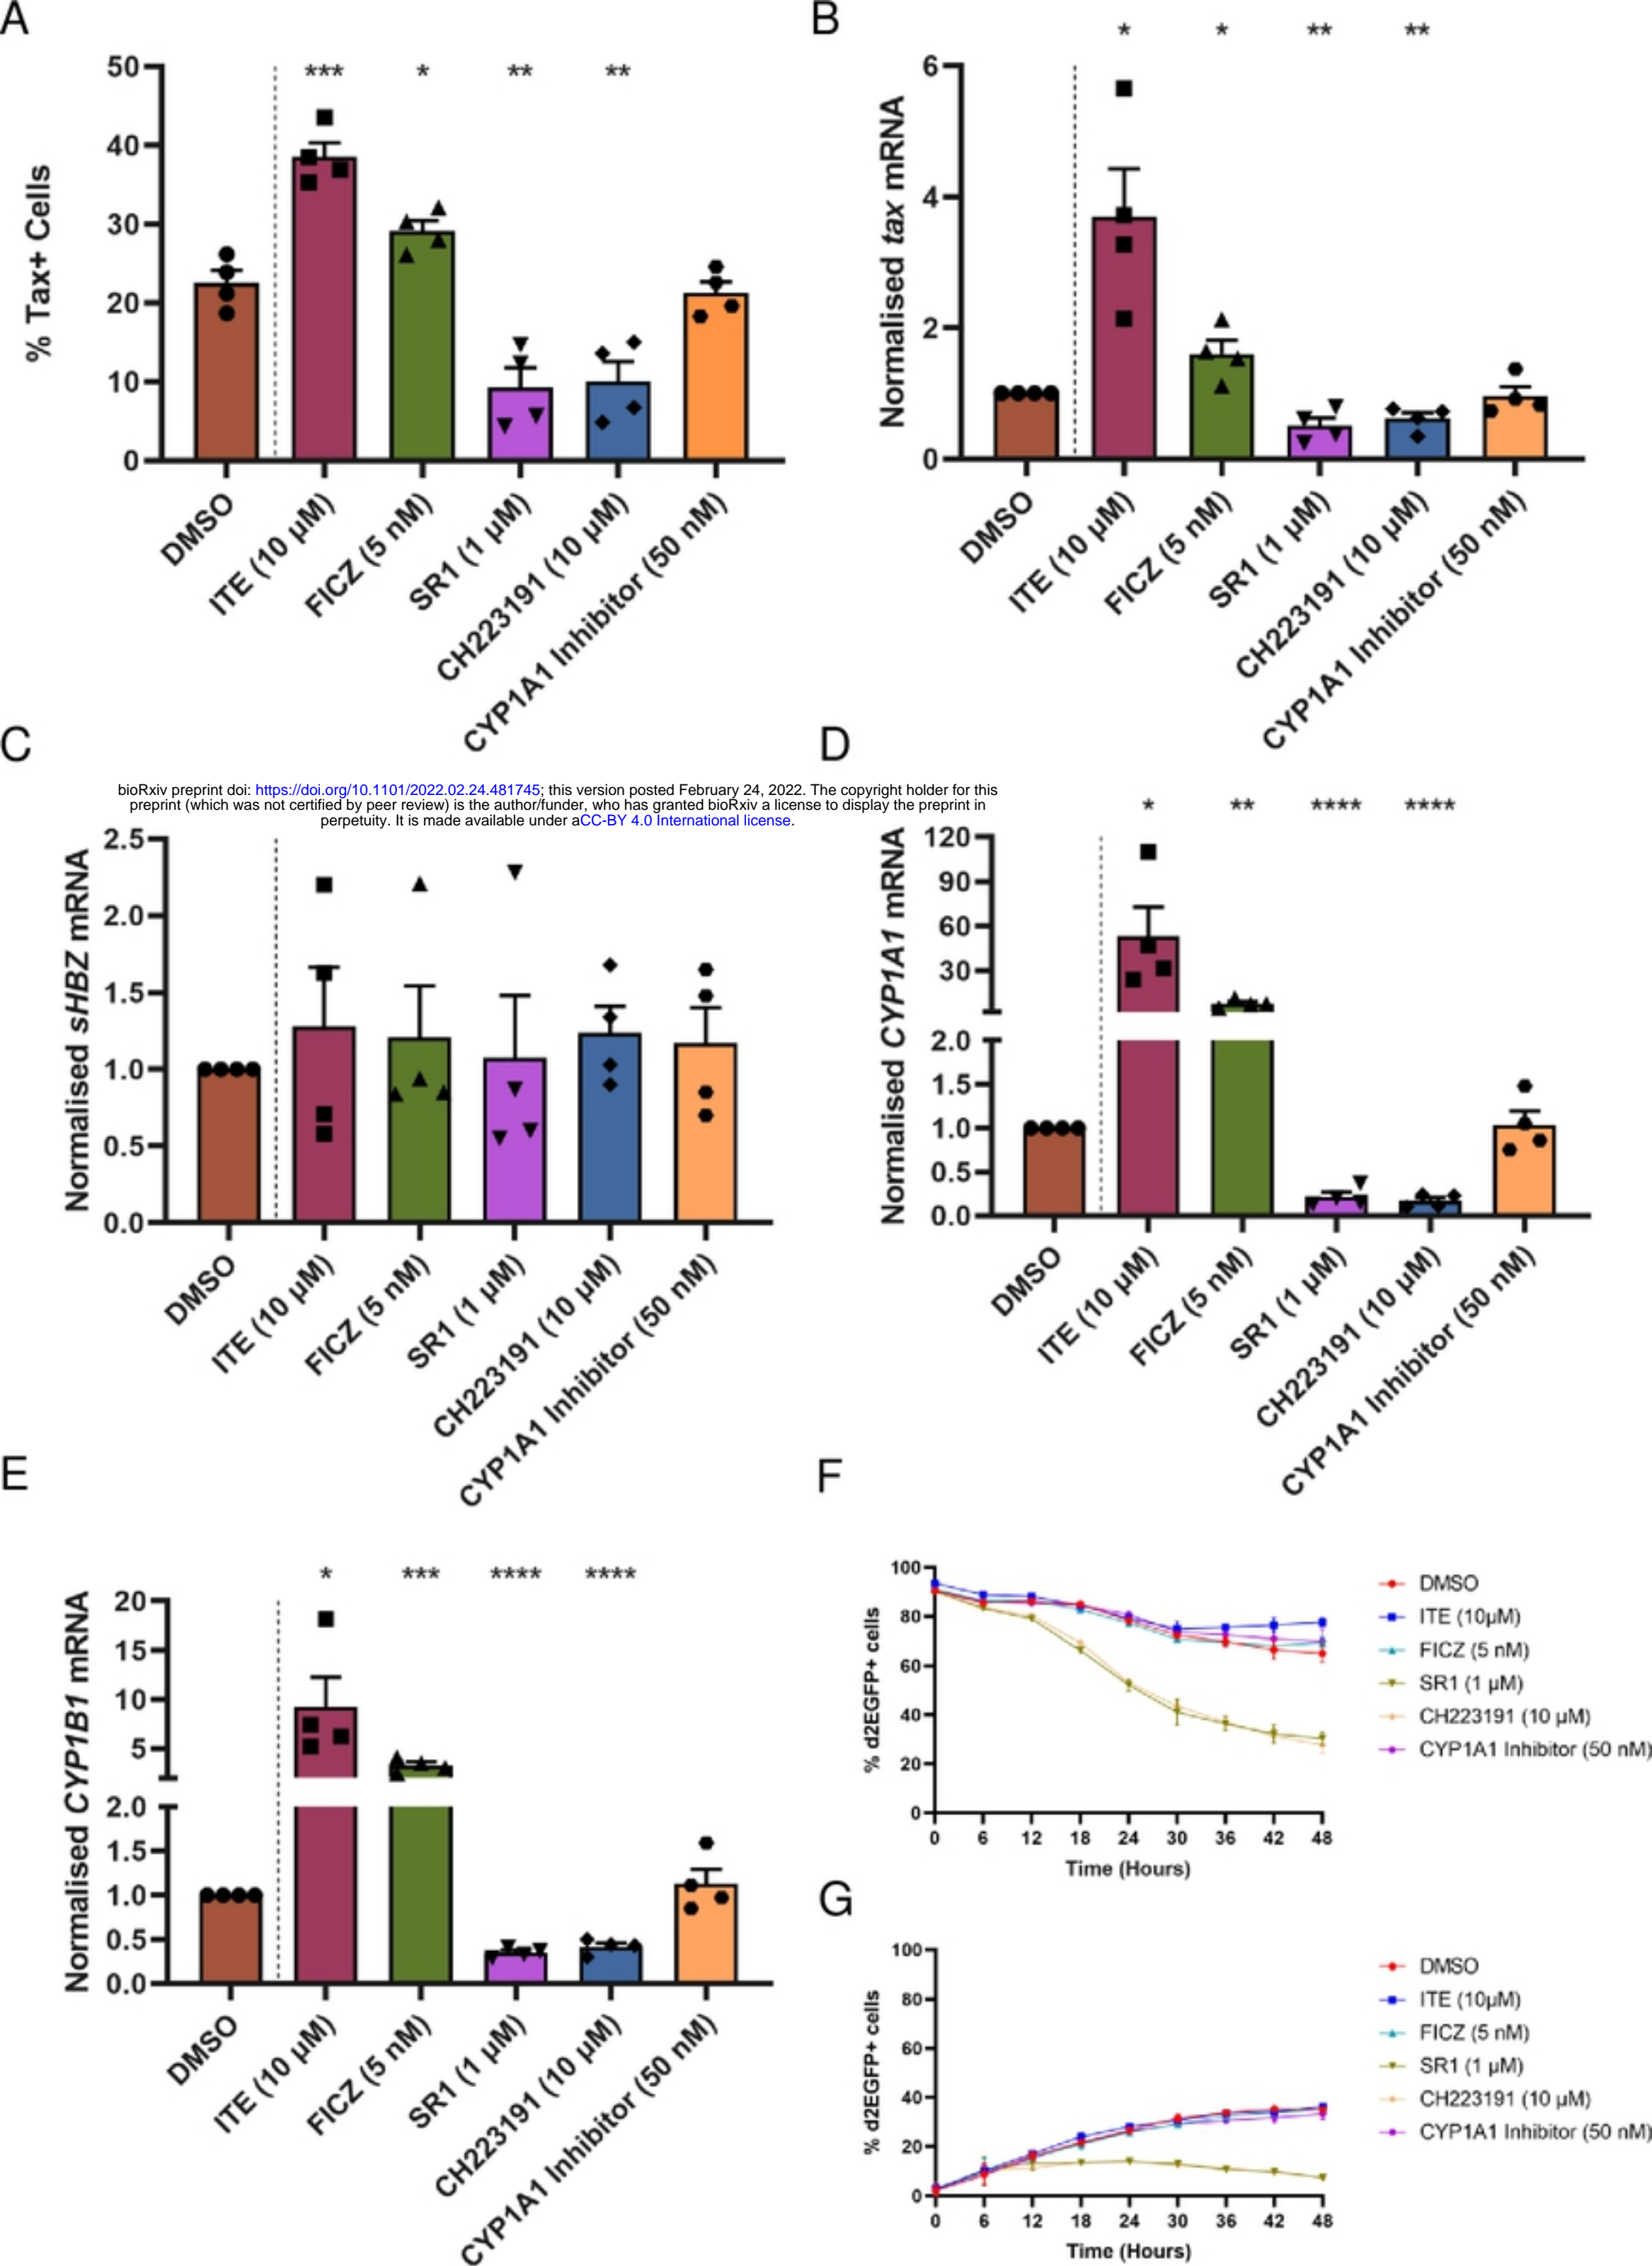

Figure 8
